# Supplementary material for: An efficient, catalyst-free and aqueous ethanol-mediated synthesis of 5-((2-aminothiazol-5-yl)(phenyl)methyl)-6-hydroxypyrimidine-2,4(1H,3H)-dione derivatives and their antioxidant activity
Source: Royal Society of Chemistry journal article supplement (doi:10.1039/d3ra03998f), 2023-01-01

## Supporting Information

### **An efficient, catalyst-free and aqueous ethanol-mediated synthesis (5-((2-aminothiazol-5-yl)(phenyl)methyl)-6-hydroxypyrimidine-2,4(1H,3H)-dione derivatives and their antioxidant activity**

Paras J. Patel <sup>a</sup>, Subham G. Patel <sup>a</sup>, Dipti B. Upadhyay <sup>a</sup>, Logeswari Ravi <sup>b</sup>,  
Anuradha Dhanasekaran <sup>b</sup>, Hitendra M. Patel <sup>a\*</sup>

<sup>a</sup> Department of Chemistry, Sardar Patel University, Vallabh Vidyanagar, 388120, Gujarat, India

<sup>b</sup> Centre for Biotechnology, Anna University, Chennai, Tamil Nadu, India

\* Corresponding Author: E-mail: hm\_patel@spuvvn.edu.

### Table of Contents

| Sr. No. | Content                                                                              | Page No.  |
|---------|--------------------------------------------------------------------------------------|-----------|
| 1.      | <sup>1</sup> H NMR, <sup>13</sup> C NMR Spectral data of all Compounds <b>4(a-r)</b> | S2 – S19  |
| 2.      | HRMS Spectral data of all Compounds <b>4(a-r)</b>                                    | S20 – S28 |

Figure S1:  $^1\text{H-NMR}$  (500 MHz, DMSO- $d_6$ ) of Compound **4a**

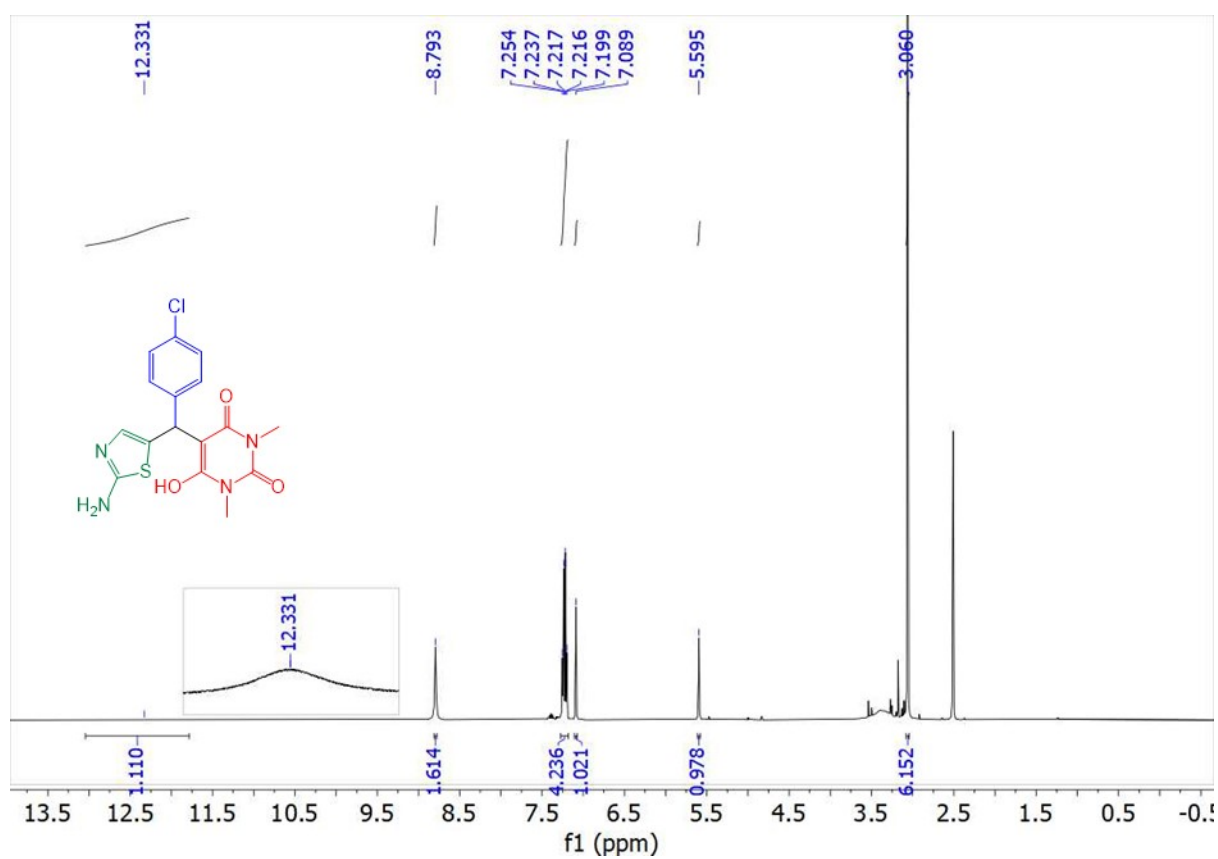

Figure S2:  $^{13}\text{C-NMR}$  (126 MHz, DMSO- $d_6$ ) of Compound **4a**

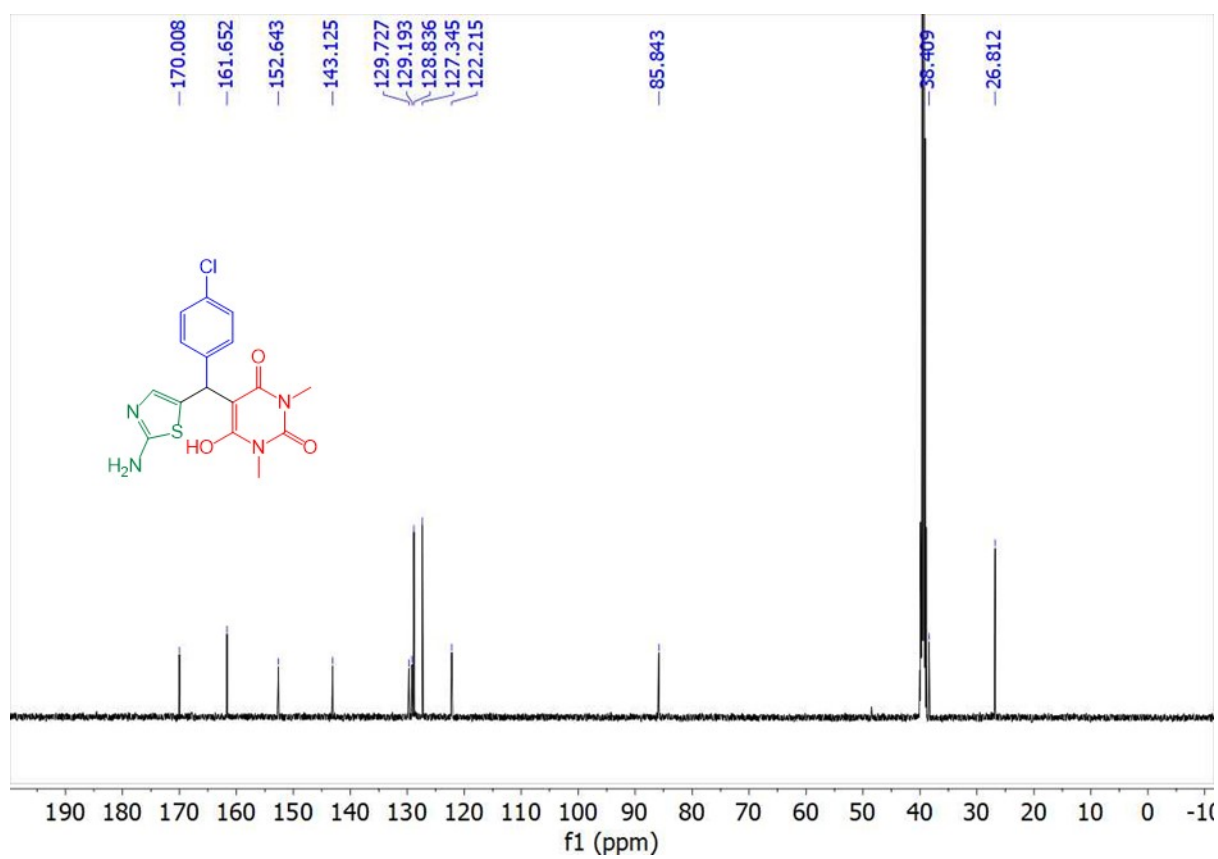

Figure S3:  $^1\text{H-NMR}$  (400 MHz,  $\text{DMSO-d}_6$ ) of Compound **4b**

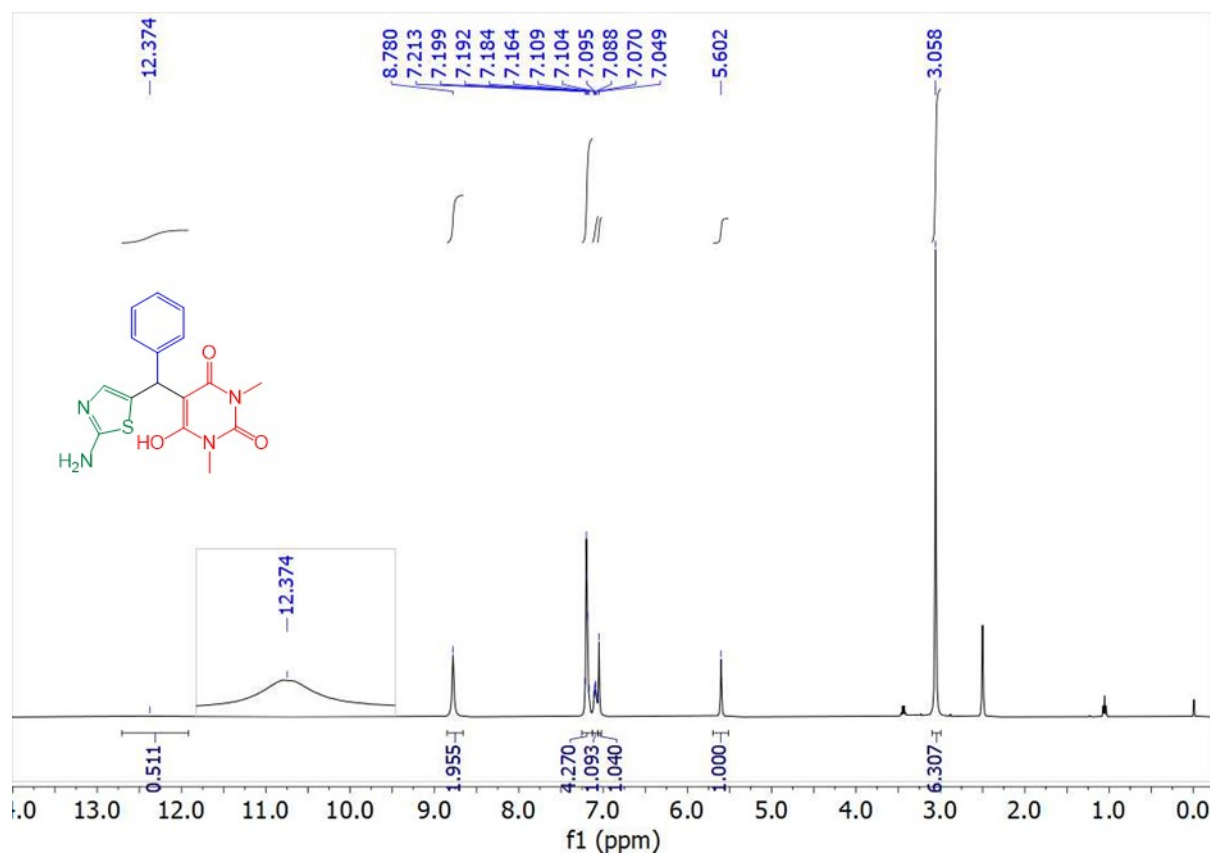

Figure S4:  $^{13}\text{C-NMR}$  (101 MHz,  $\text{DMSO-d}_6$ ) of Compound **4b**

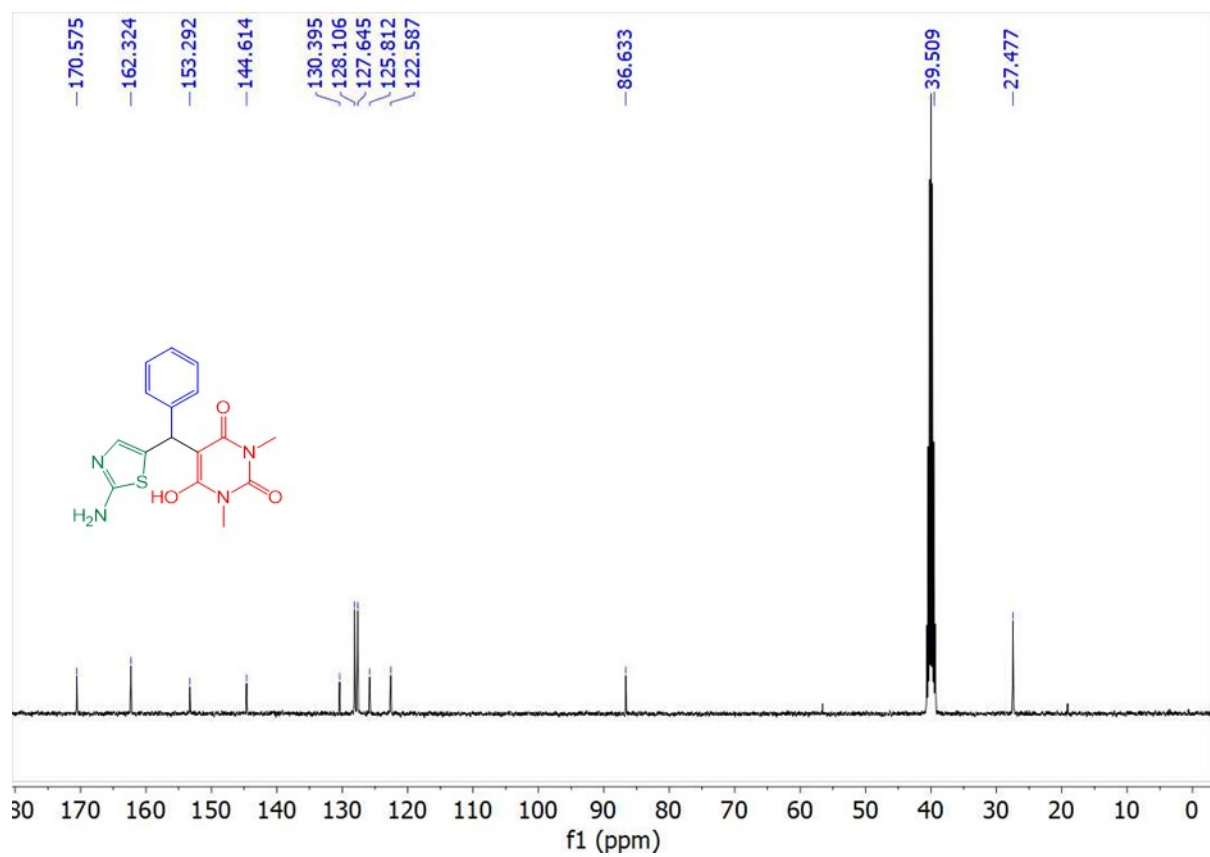

Figure S5:  $^1\text{H-NMR}$  (400 MHz,  $\text{DMSO-d}_6$ ) of Compound **4c**

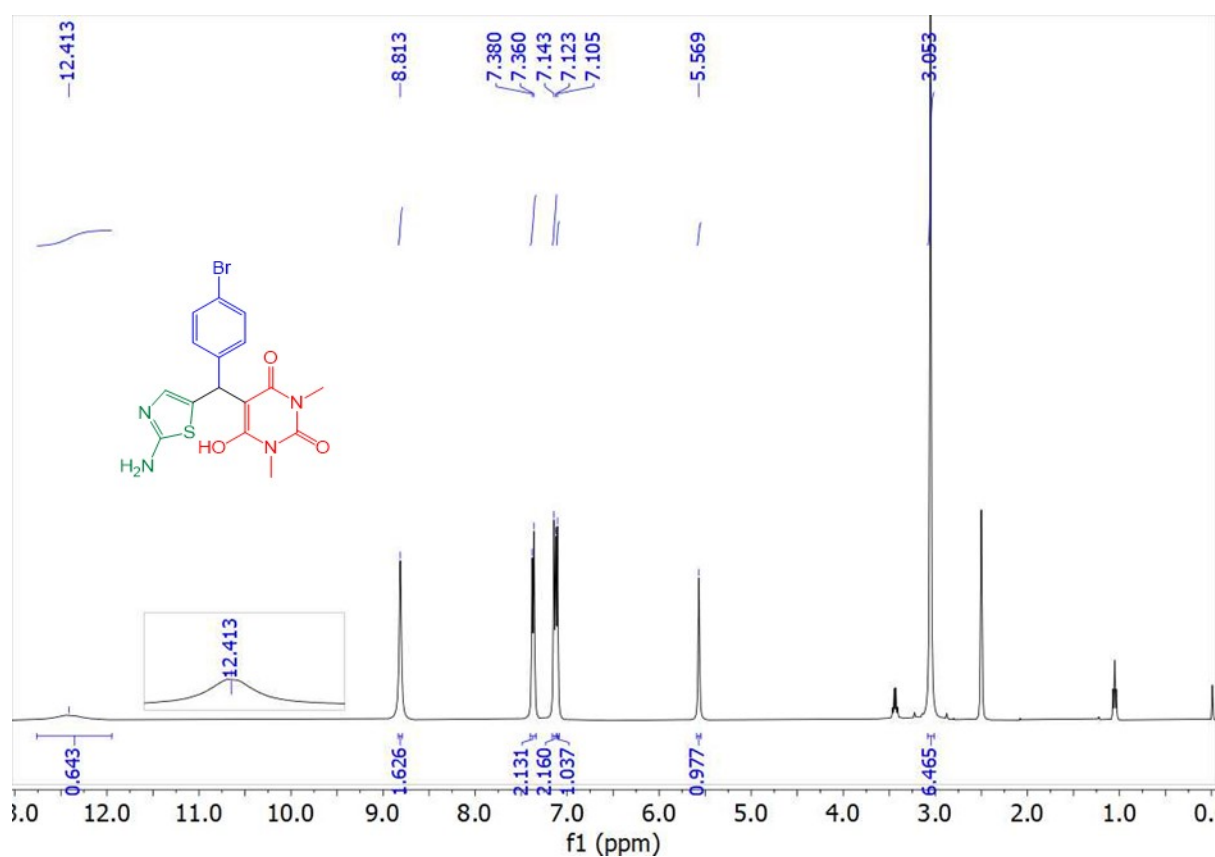

Figure S6:  $^{13}\text{C-NMR}$  (101 MHz,  $\text{DMSO-d}_6$ ) of Compound **4c**

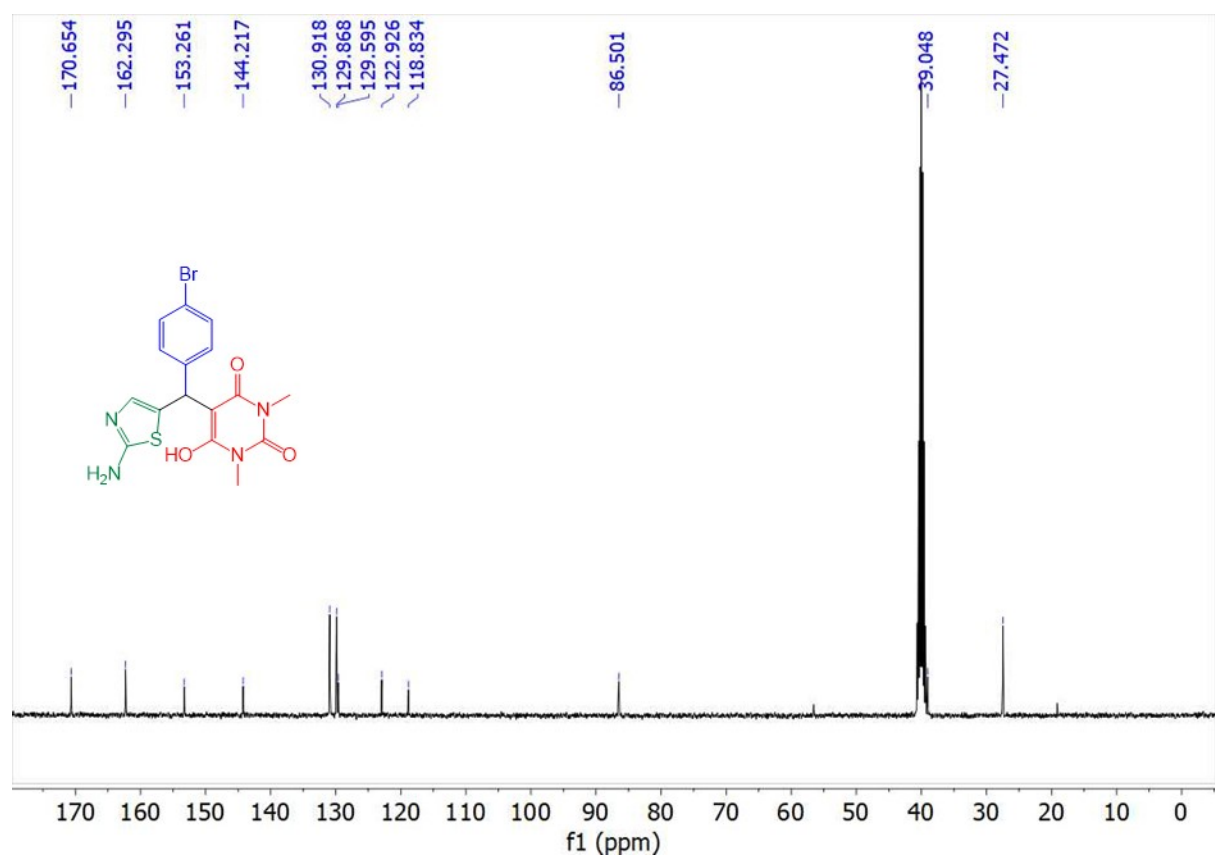

Figure S7:  $^1\text{H-NMR}$  (400 MHz, DMSO- $d_6$ ) of Compound **4d**

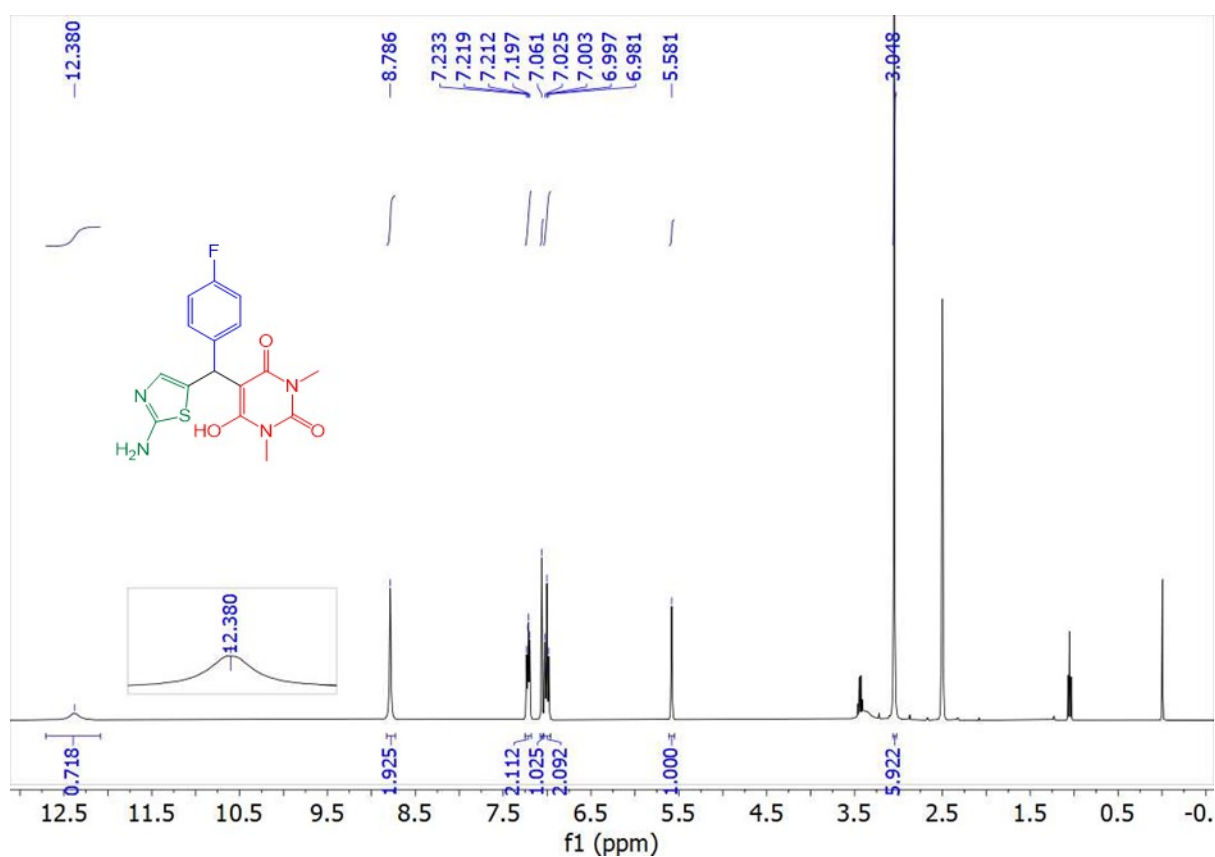

Figure S8:  $^{13}\text{C-NMR}$  (101 MHz, DMSO- $d_6$ ) of Compound **4d**

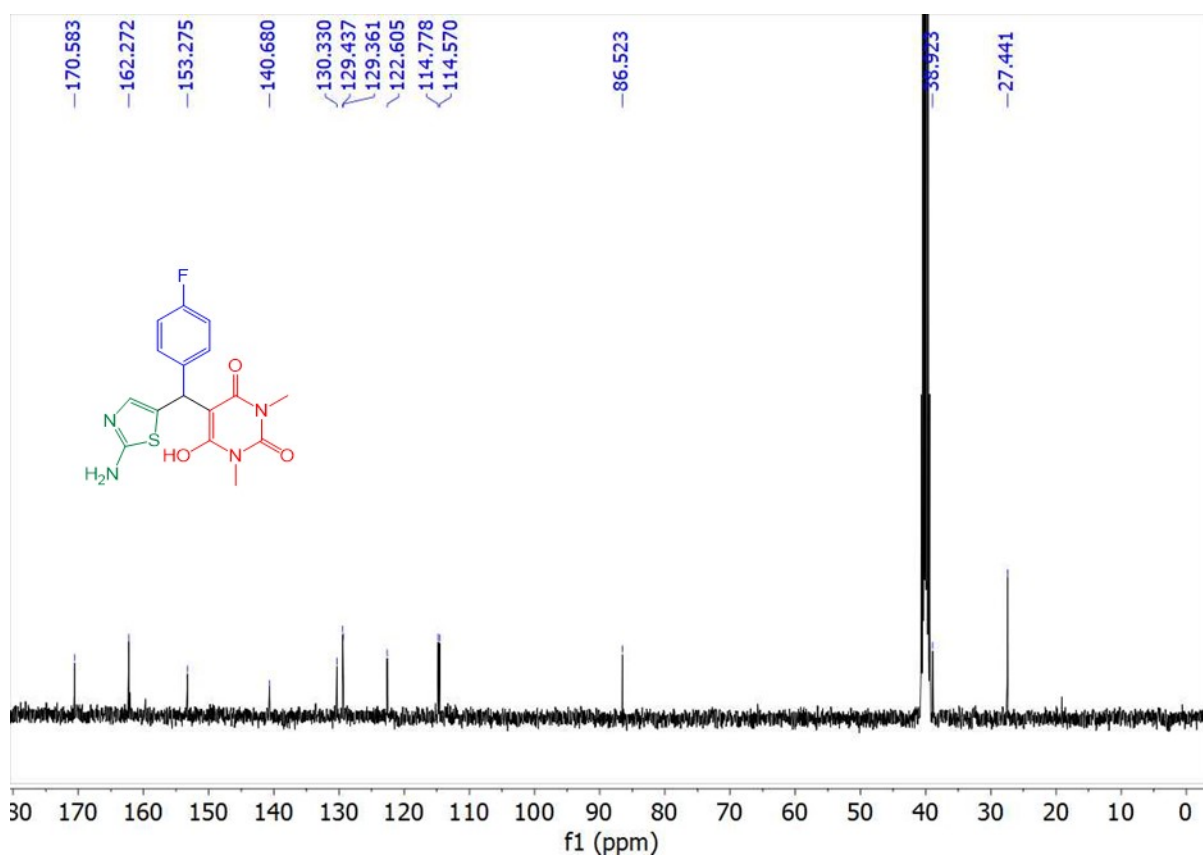

Figure S9:  $^1\text{H-NMR}$  (400 MHz,  $\text{DMSO-d}_6$ ) of Compound **4e**

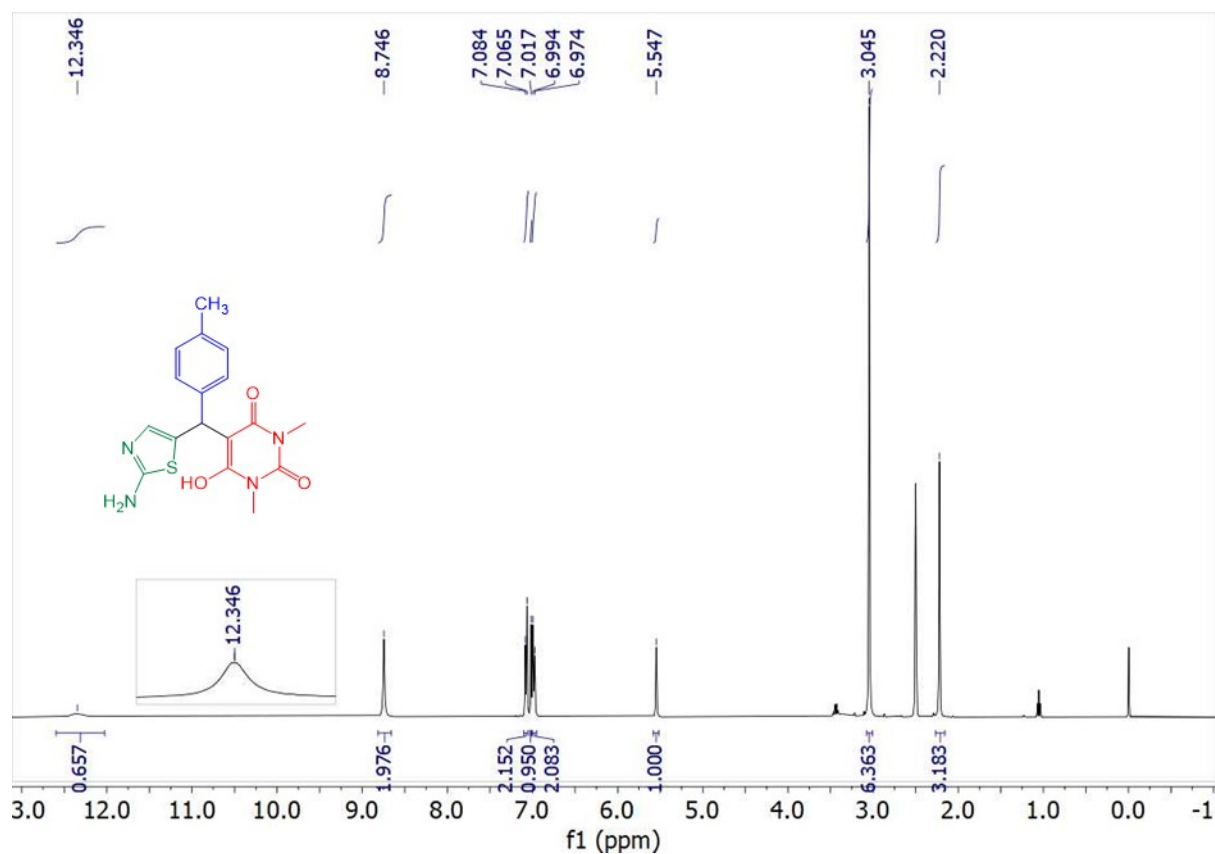

Figure S10:  $^{13}\text{C-NMR}$  (101 MHz,  $\text{DMSO-d}_6$ ) of Compound **4e**

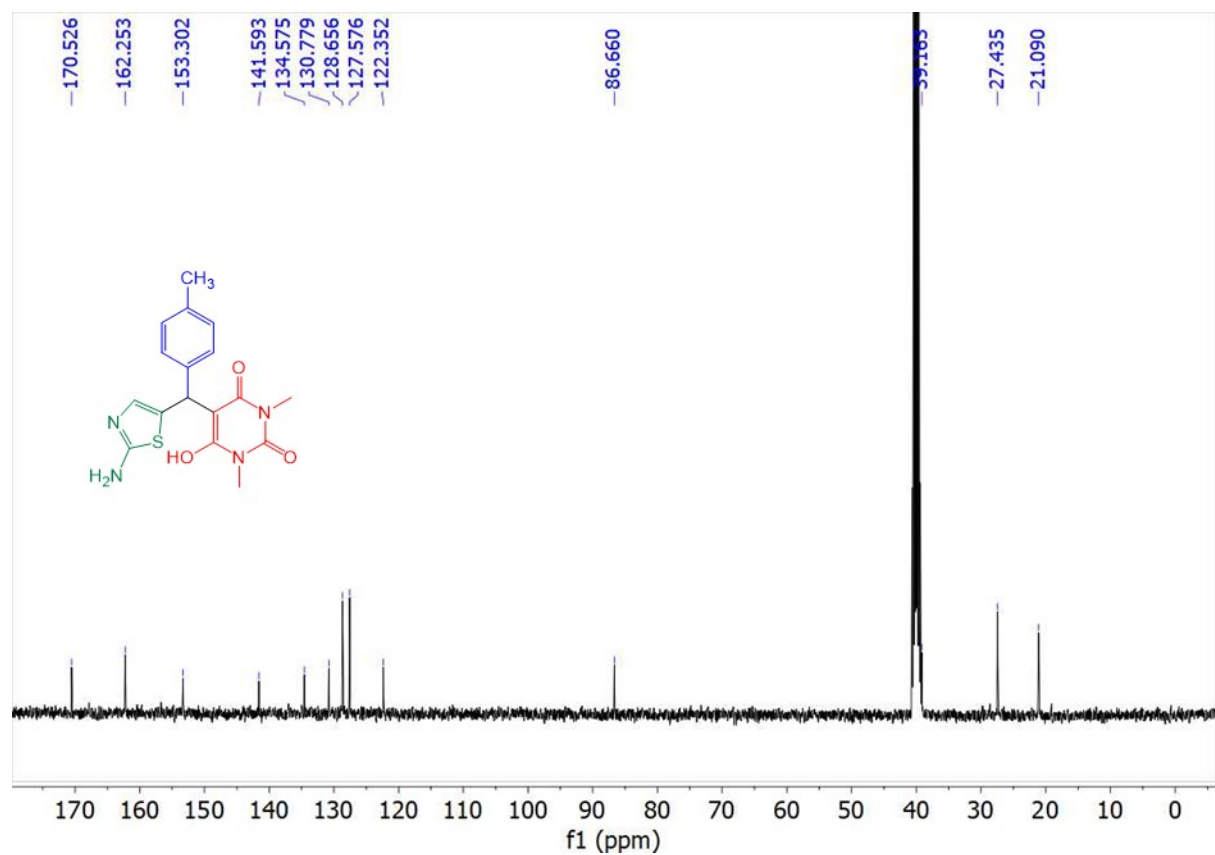

Figure S11:  $^1\text{H-NMR}$  (400 MHz,  $\text{DMSO-d}_6$ ) of Compound **4f**

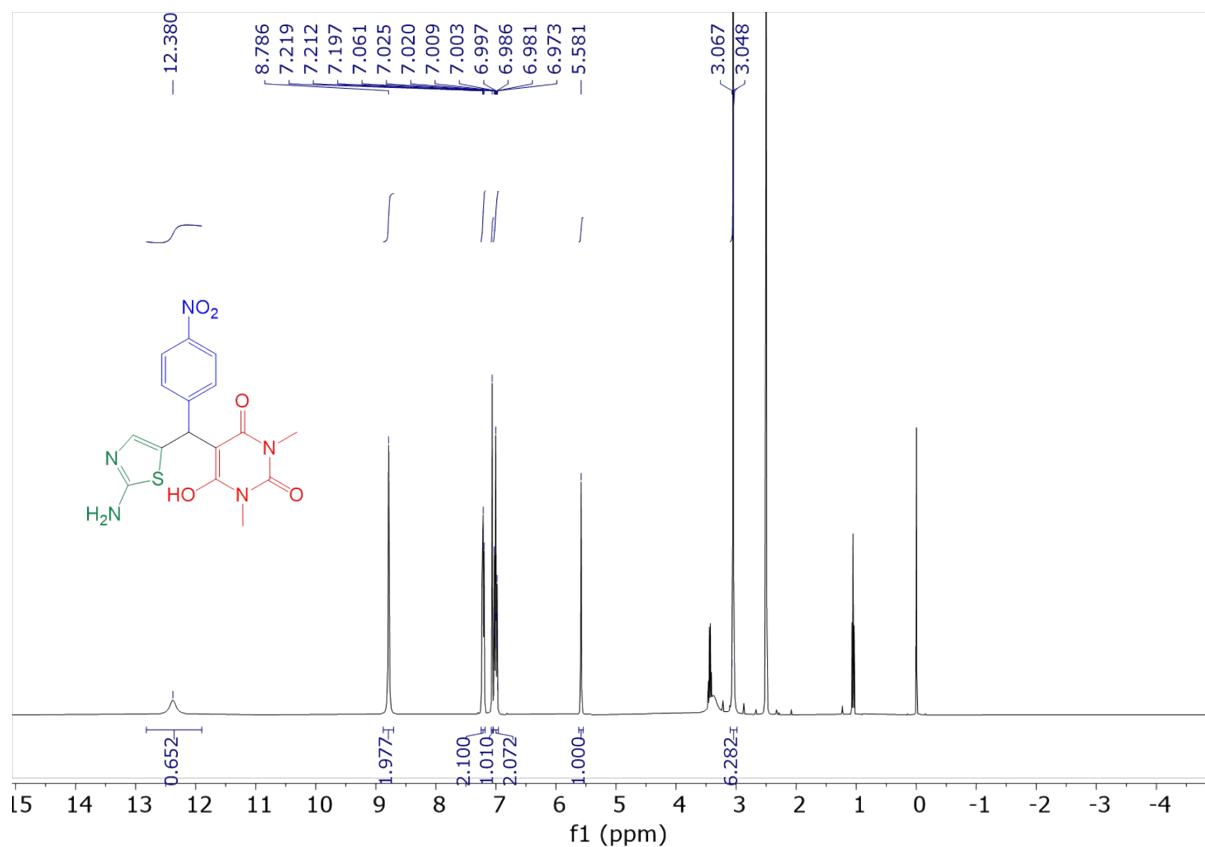

Figure S12:  $^{13}\text{C-NMR}$  (101 MHz,  $\text{DMSO-d}_6$ ) of Compound **4f**

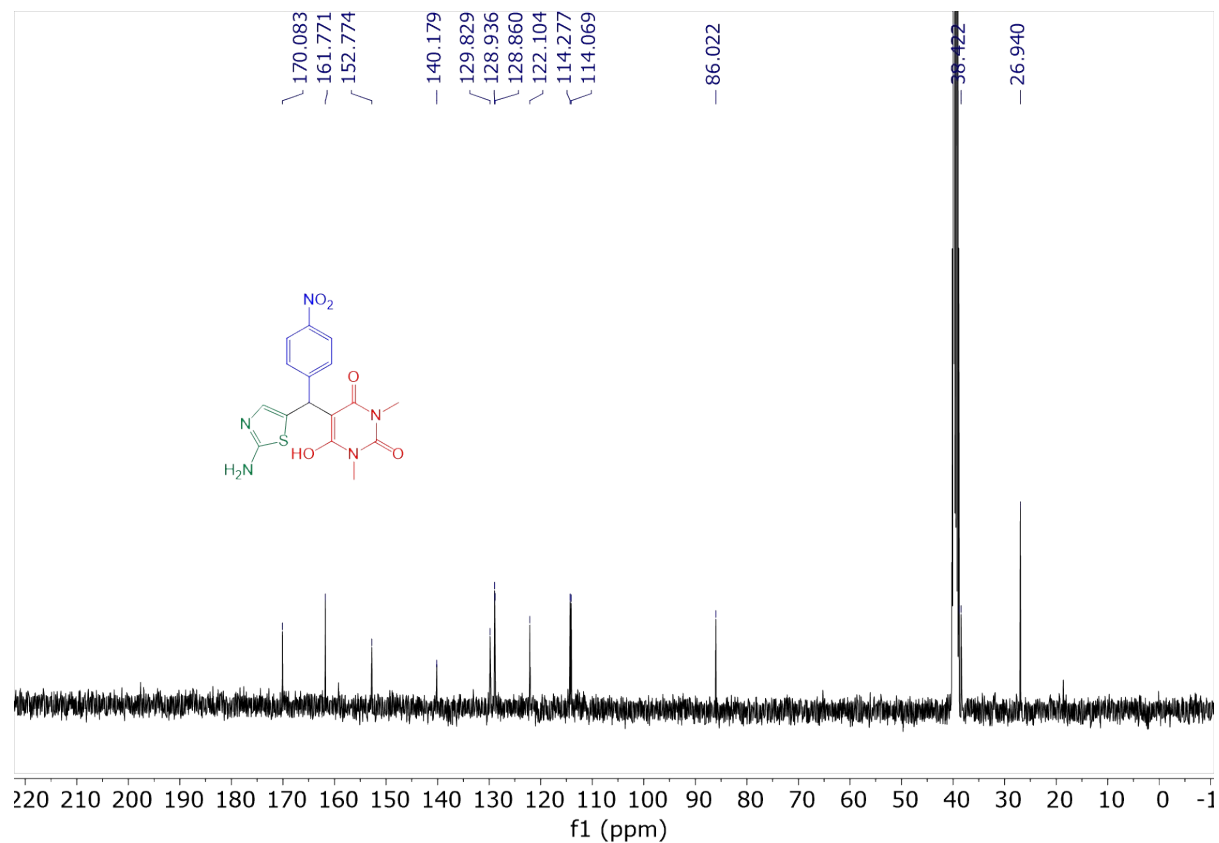

Figure S13:  $^1\text{H-NMR}$  (400 MHz,  $\text{DMSO-d}_6$ ) of Compound **4g**

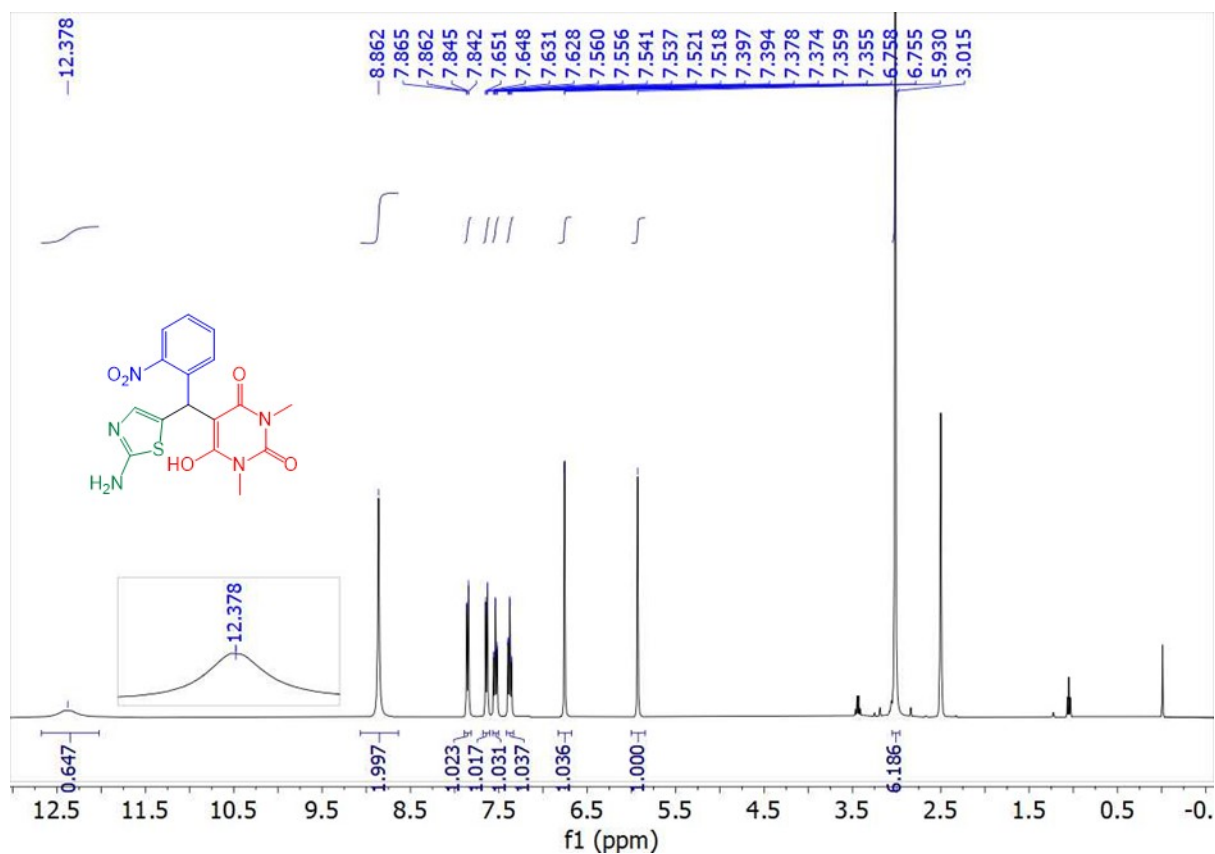

Figure S14:  $^{13}\text{C-NMR}$  (101 MHz,  $\text{DMSO-d}_6$ ) of Compound **4g**

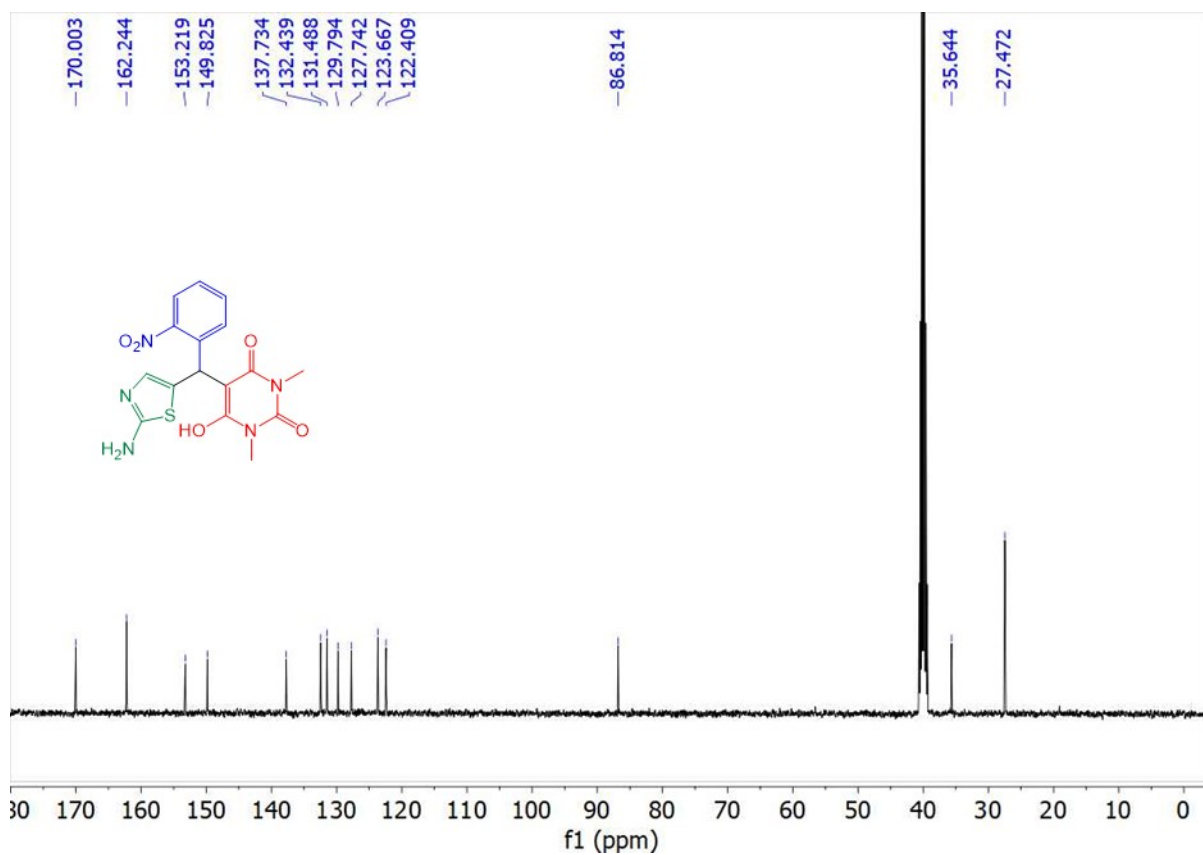



Figure S15:  $^1\text{H-NMR}$  (400 MHz, DMSO- $d_6$ ) of Compound **4h**

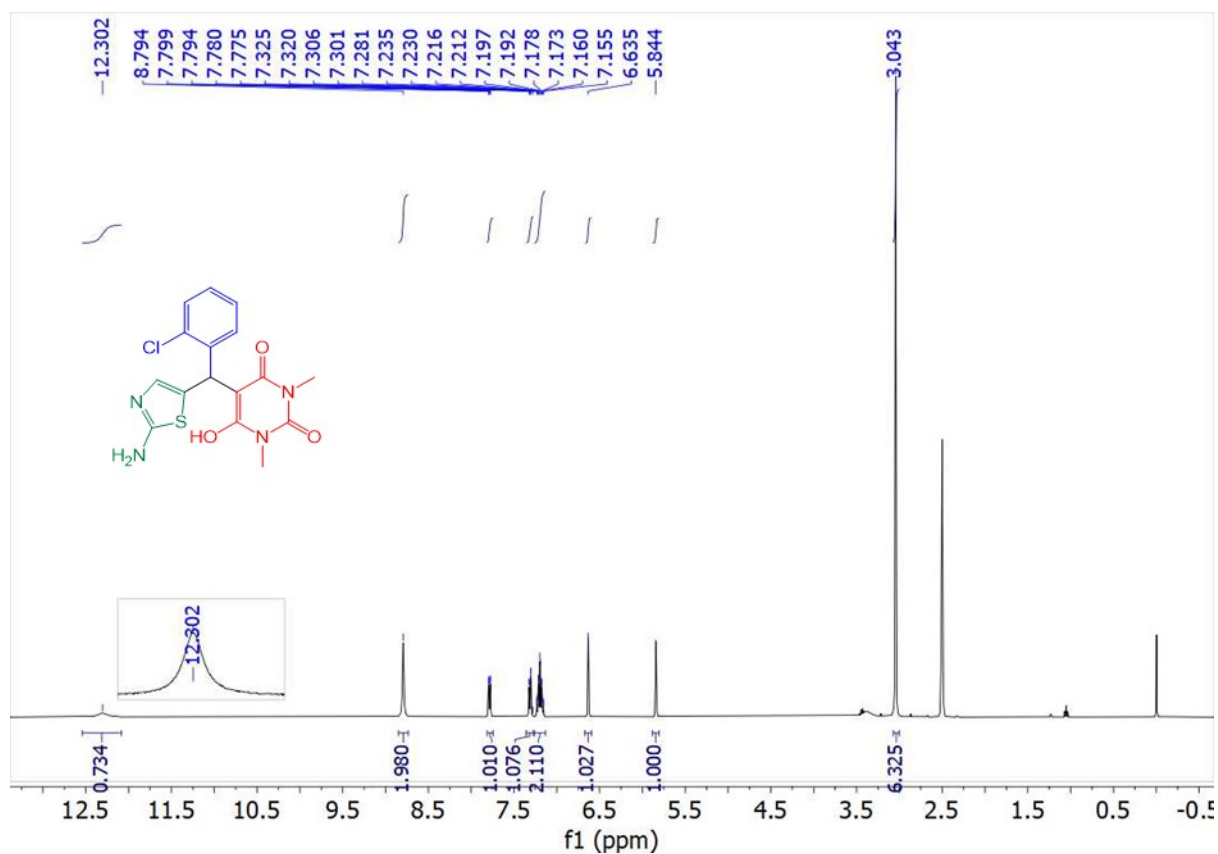

Figure S16:  $^{13}\text{C-NMR}$  (101 MHz, DMSO- $d_6$ ) of Compound **4h**

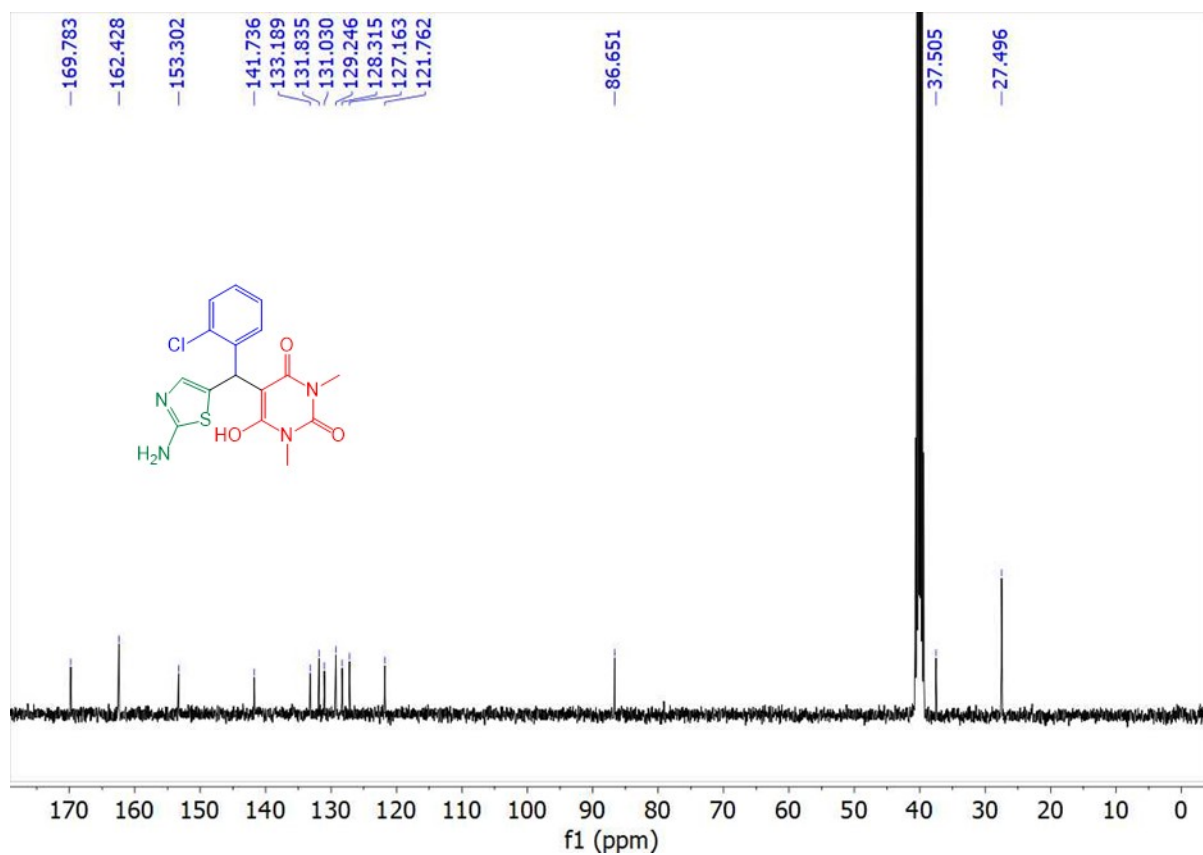

Figure S17:  $^1\text{H-NMR}$  (400 MHz, DMSO- $d_6$ ) of Compound **4i**

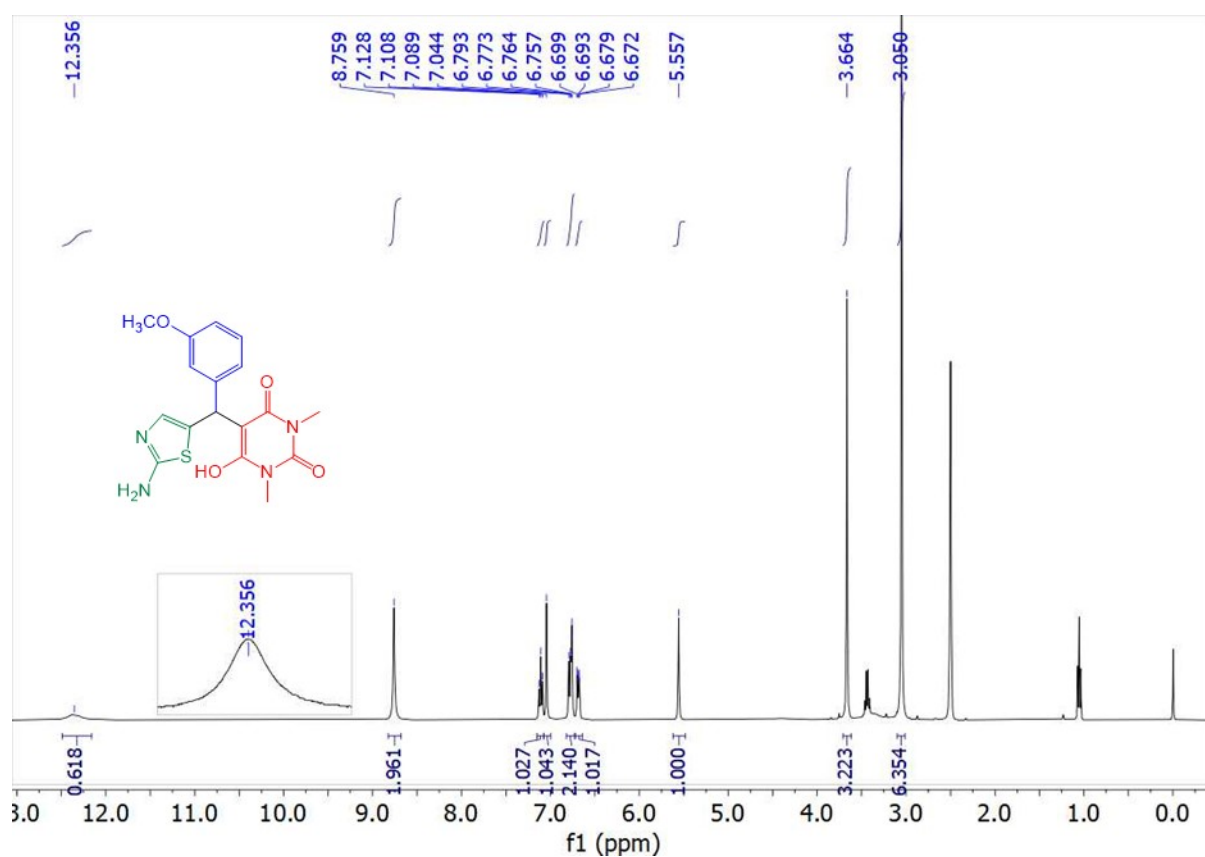

Figure S18:  $^{13}\text{C-NMR}$  (101 MHz, DMSO- $d_6$ ) of Compound **4i**

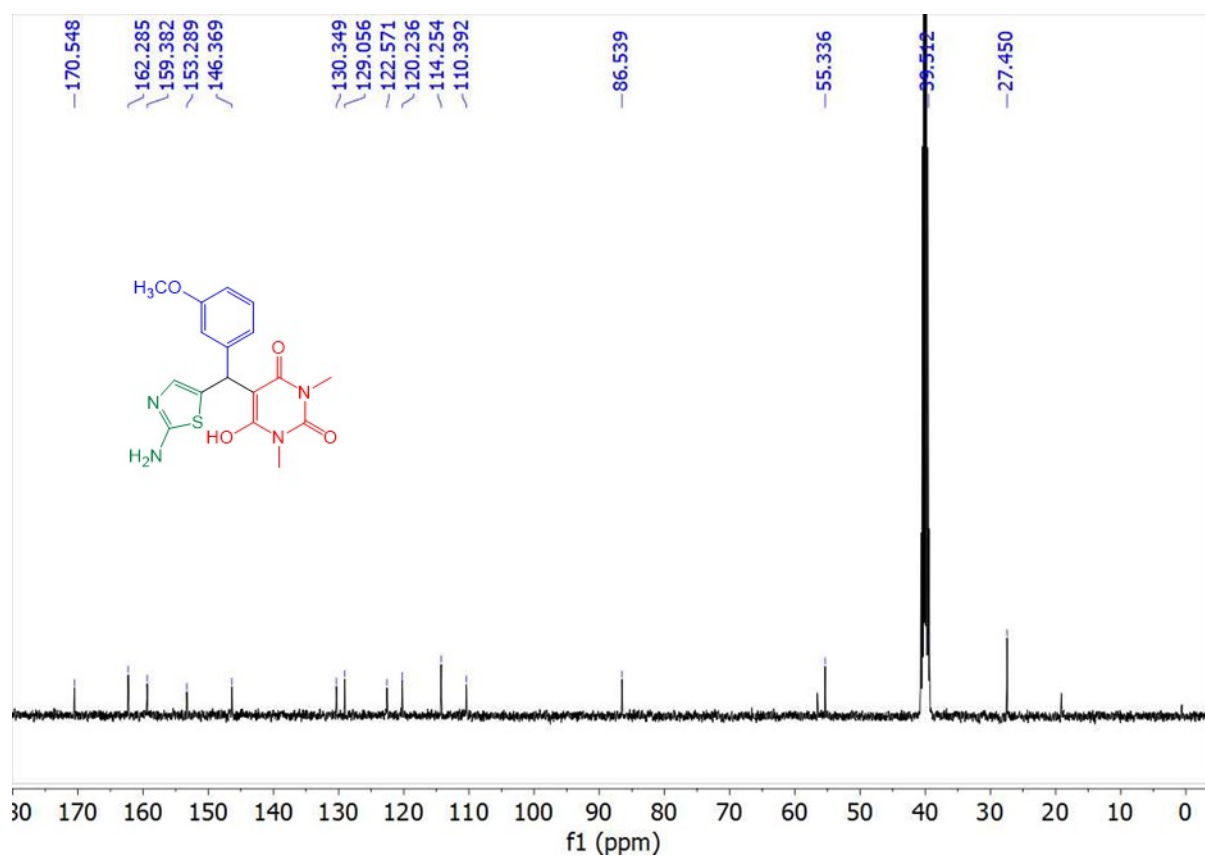

Figure S19:  $^1\text{H-NMR}$  (400 MHz,  $\text{DMSO-d}_6$ ) of Compound **4j**

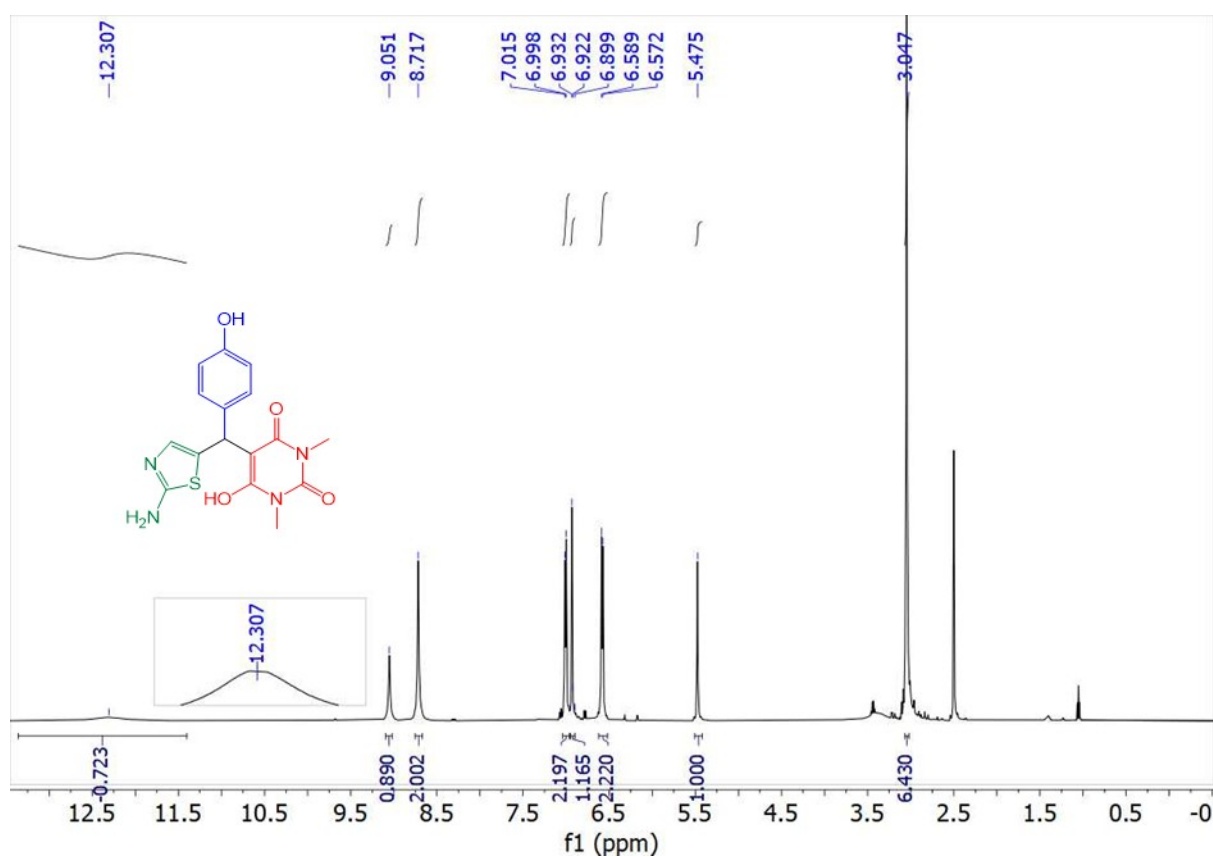

Figure S20:  $^{13}\text{C-NMR}$  (101 MHz,  $\text{DMSO-d}_6$ ) of Compound **4j**

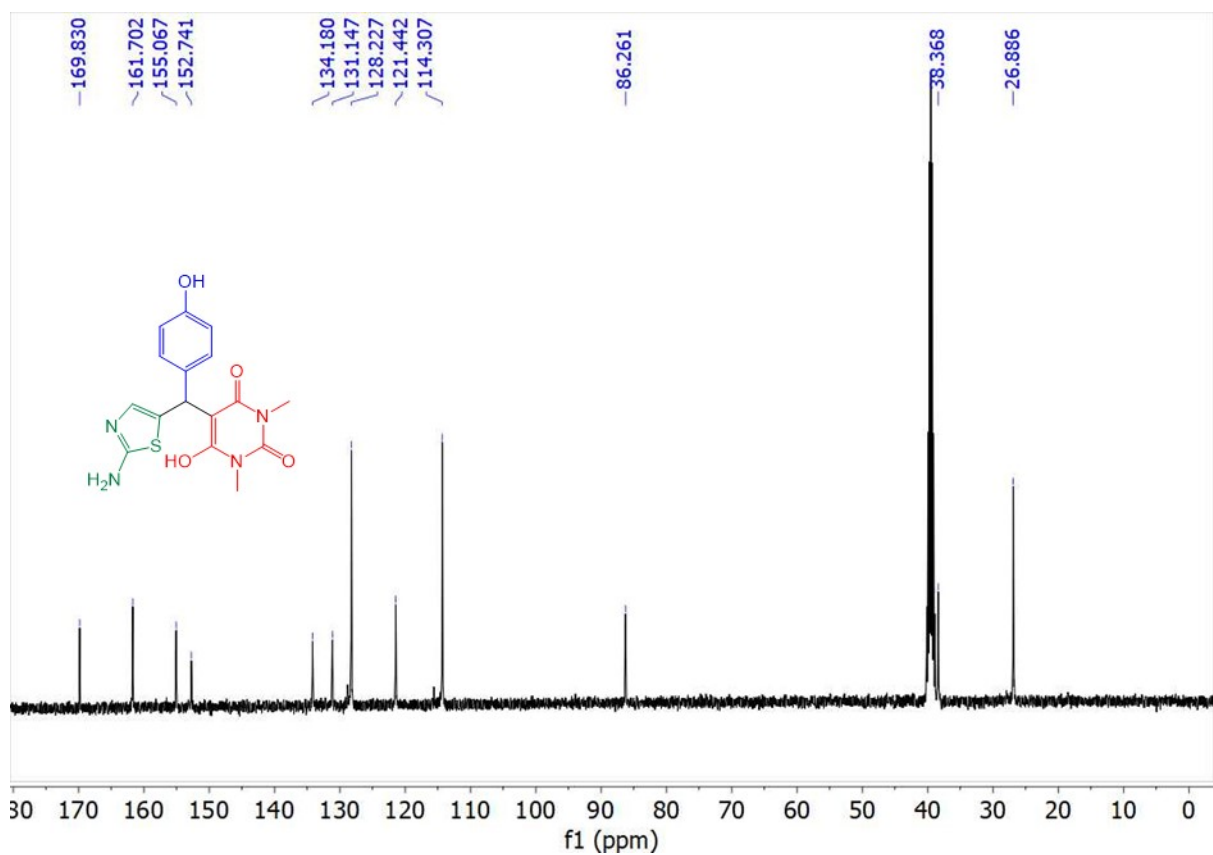

Figure S21:  $^1\text{H-NMR}$  (400 MHz,  $\text{DMSO-d}_6$ ) of Compound **4k**

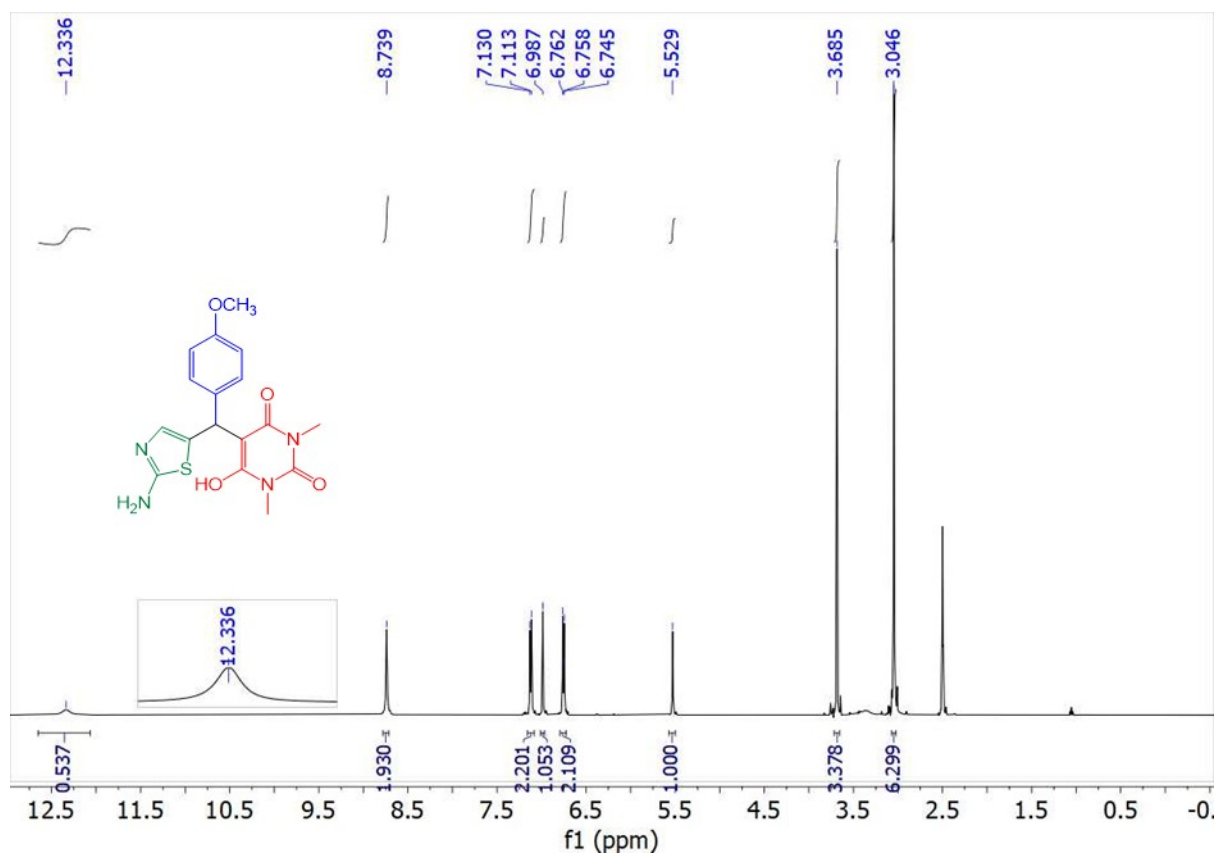

Figure S22:  $^{13}\text{C-NMR}$  (101 MHz,  $\text{DMSO-d}_6$ ) of Compound **4k**

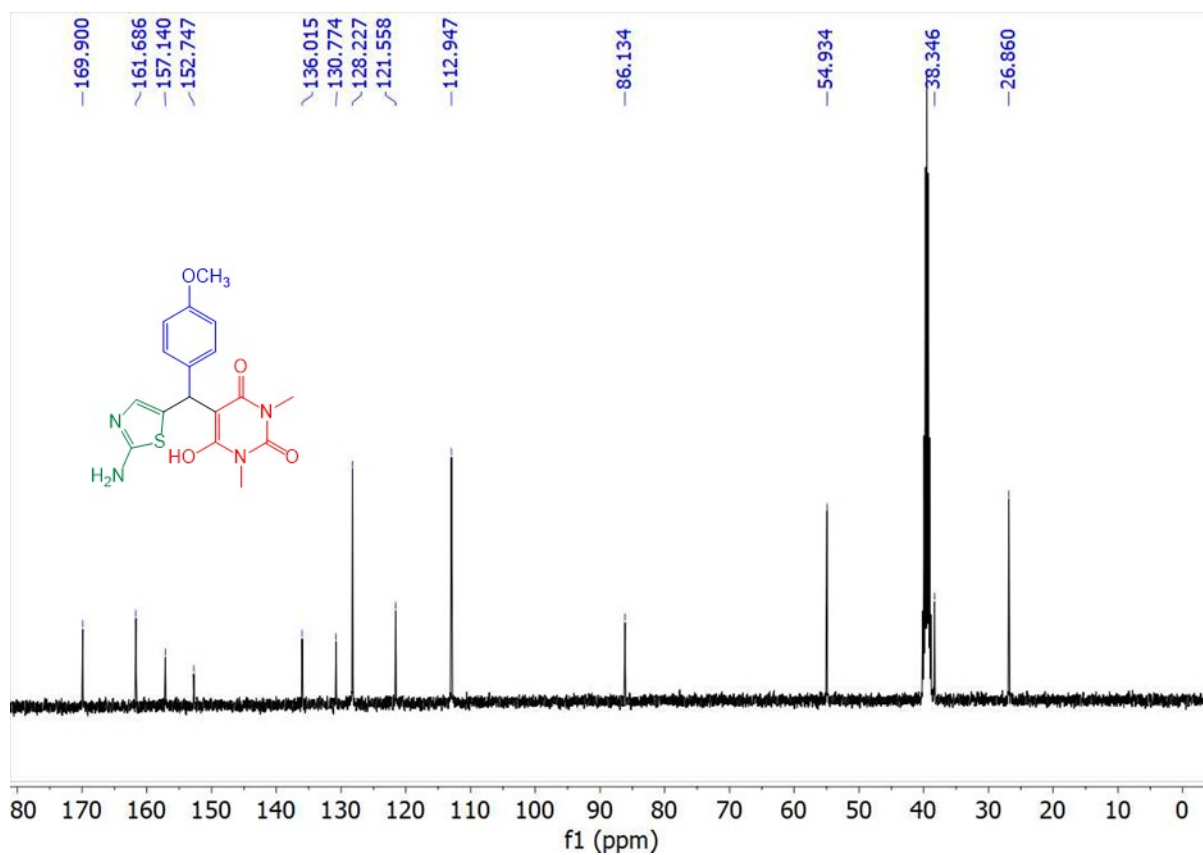

Figure S23:  $^1\text{H-NMR}$  (400 MHz, DMSO- $d_6$ ) of Compound **4I**

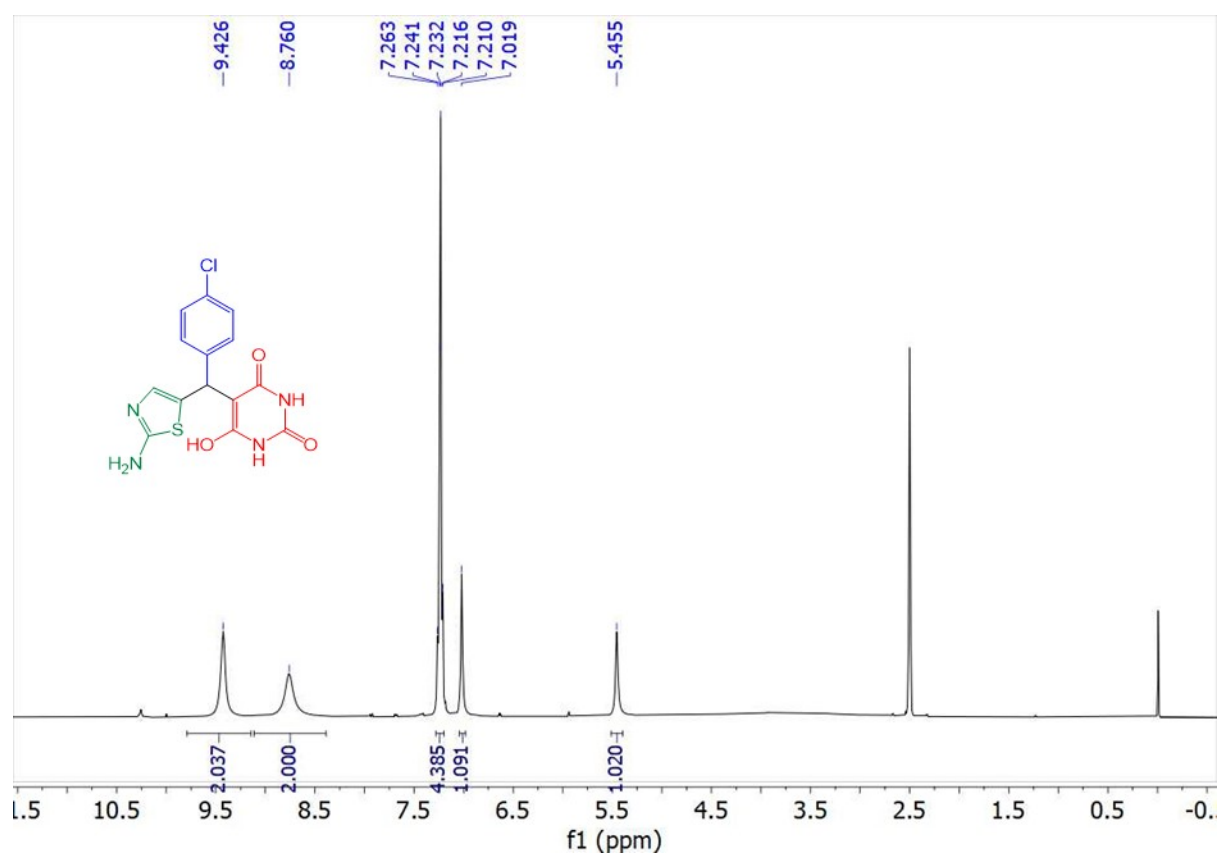

Figure S24:  $^{13}\text{C-NMR}$  (126 MHz, DMSO- $d_6$ ) of Compound **4I**.

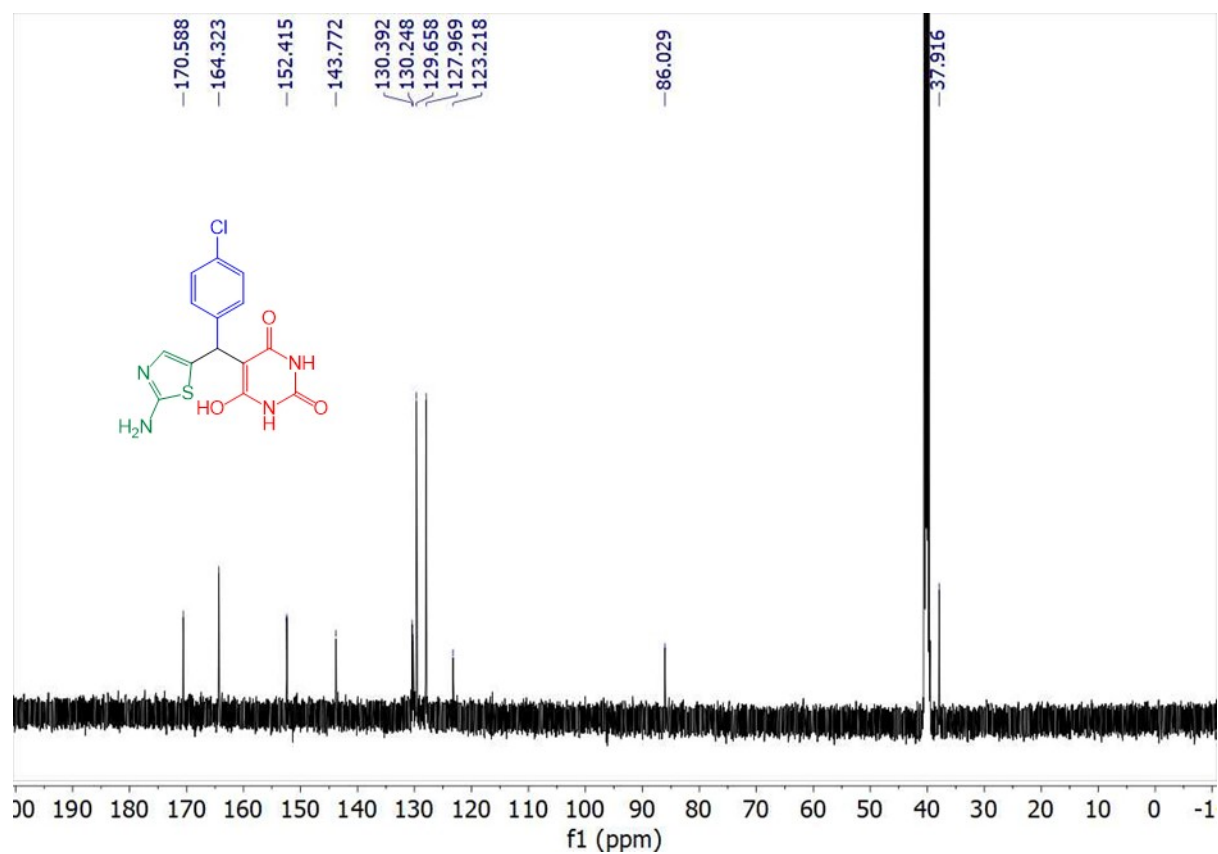

Figure S25: <sup>1</sup>H-NMR (400 MHz, DMSO-d<sub>6</sub>) of Compound **4m**

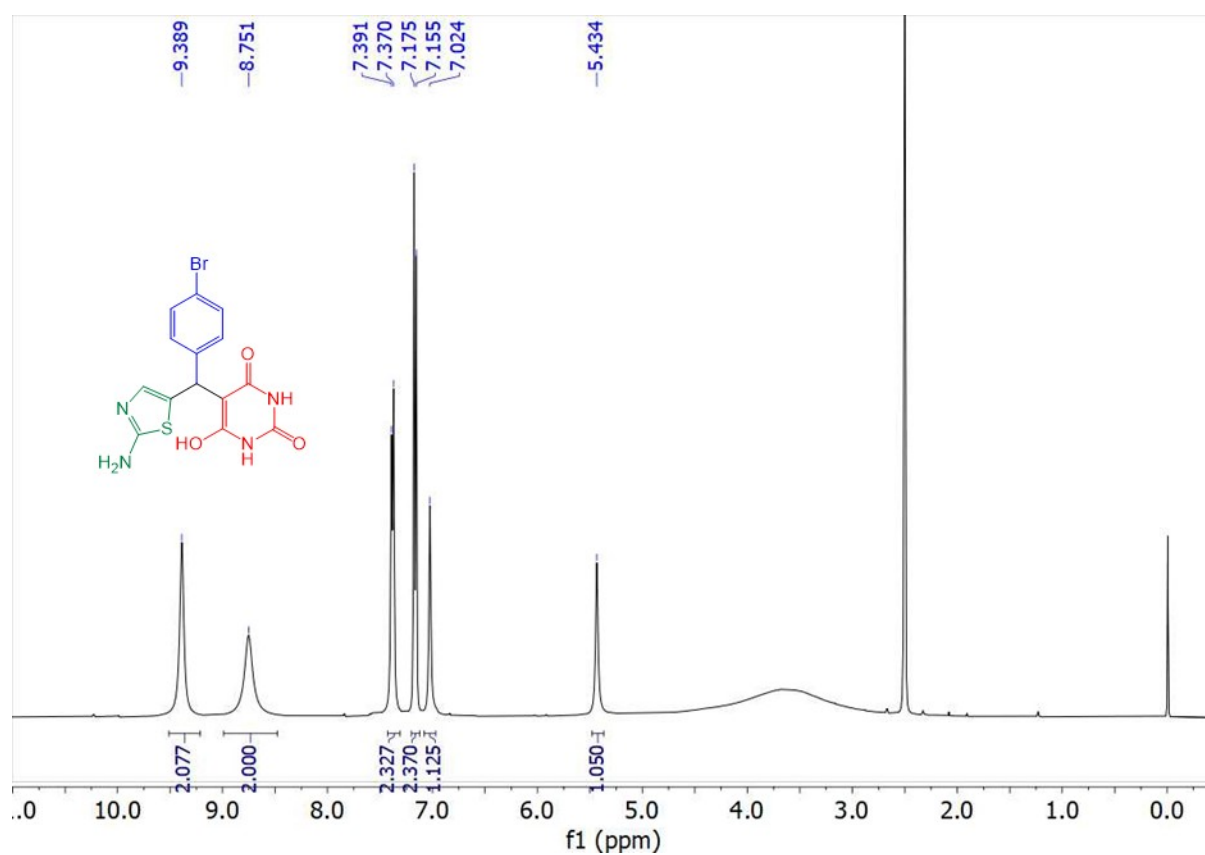

Figure S26: <sup>13</sup>C-NMR (126 MHz, DMSO-d<sub>6</sub>) of Compound **4m**

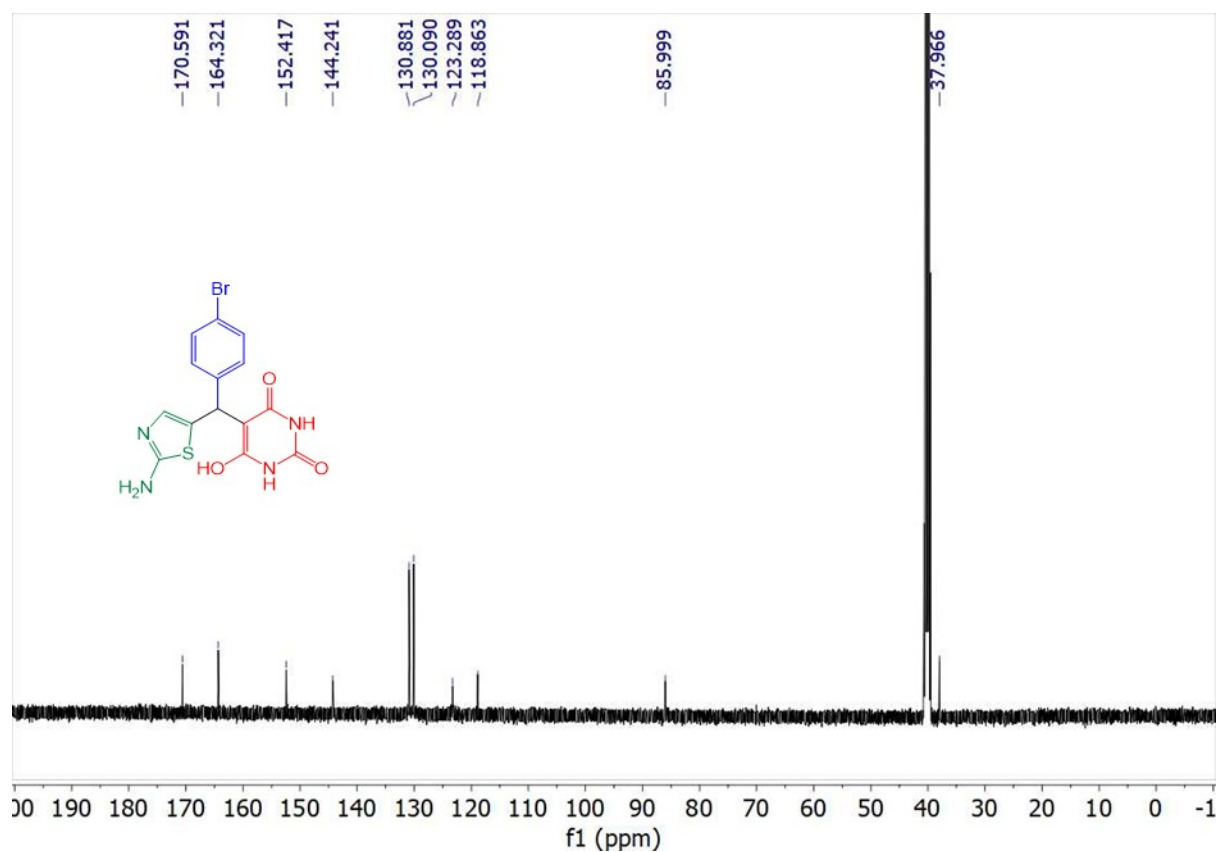

Figure S27:  $^1\text{H-NMR}$  (400 MHz, DMSO- $d_6$ ) of Compound **4n**

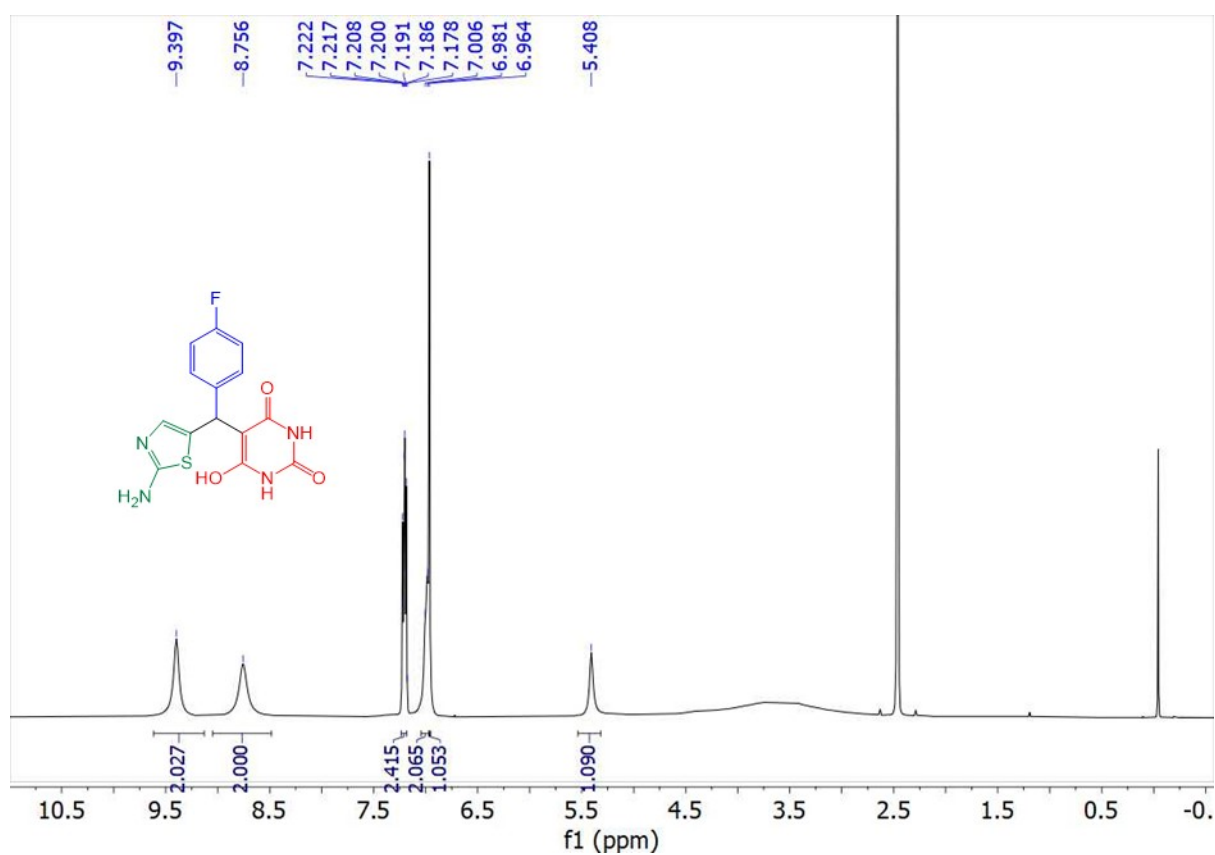

Figure S28:  $^{13}\text{C-NMR}$  (126 MHz, DMSO- $d_6$ ) of Compound **4n**

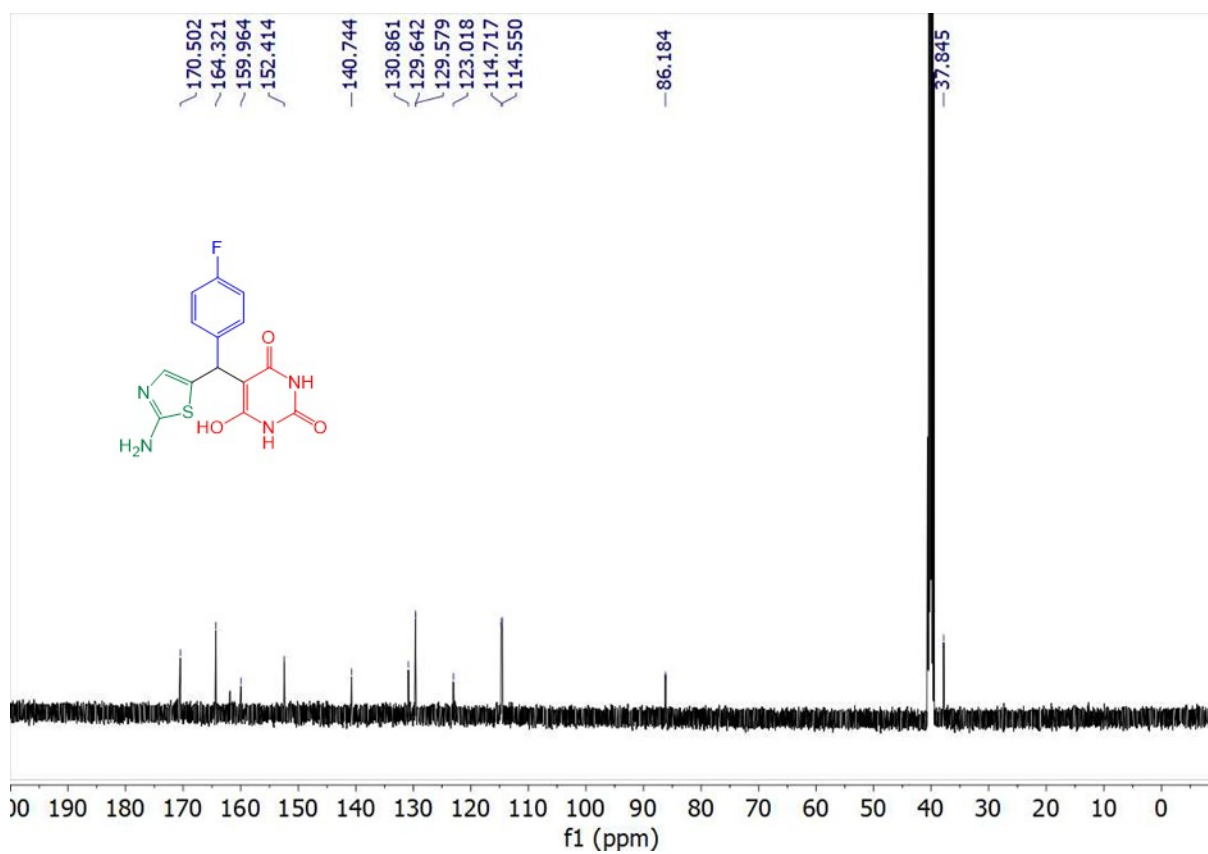

Figure S29:  $^1\text{H-NMR}$  (400 MHz,  $\text{DMSO-d}_6$ ) of Compound **4o**

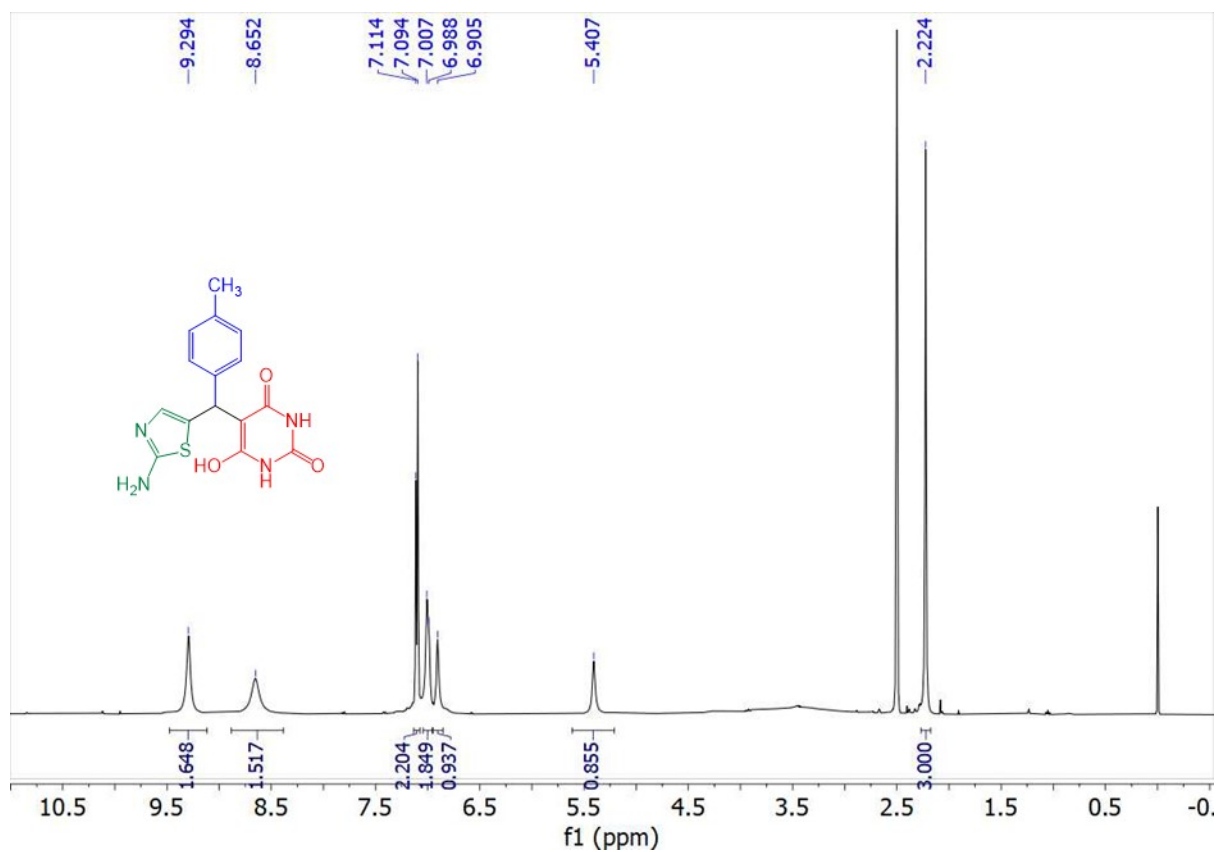

Figure S30:  $^{13}\text{C-NMR}$  (126 MHz,  $\text{DMSO-d}_6$ ) of Compound **4o**

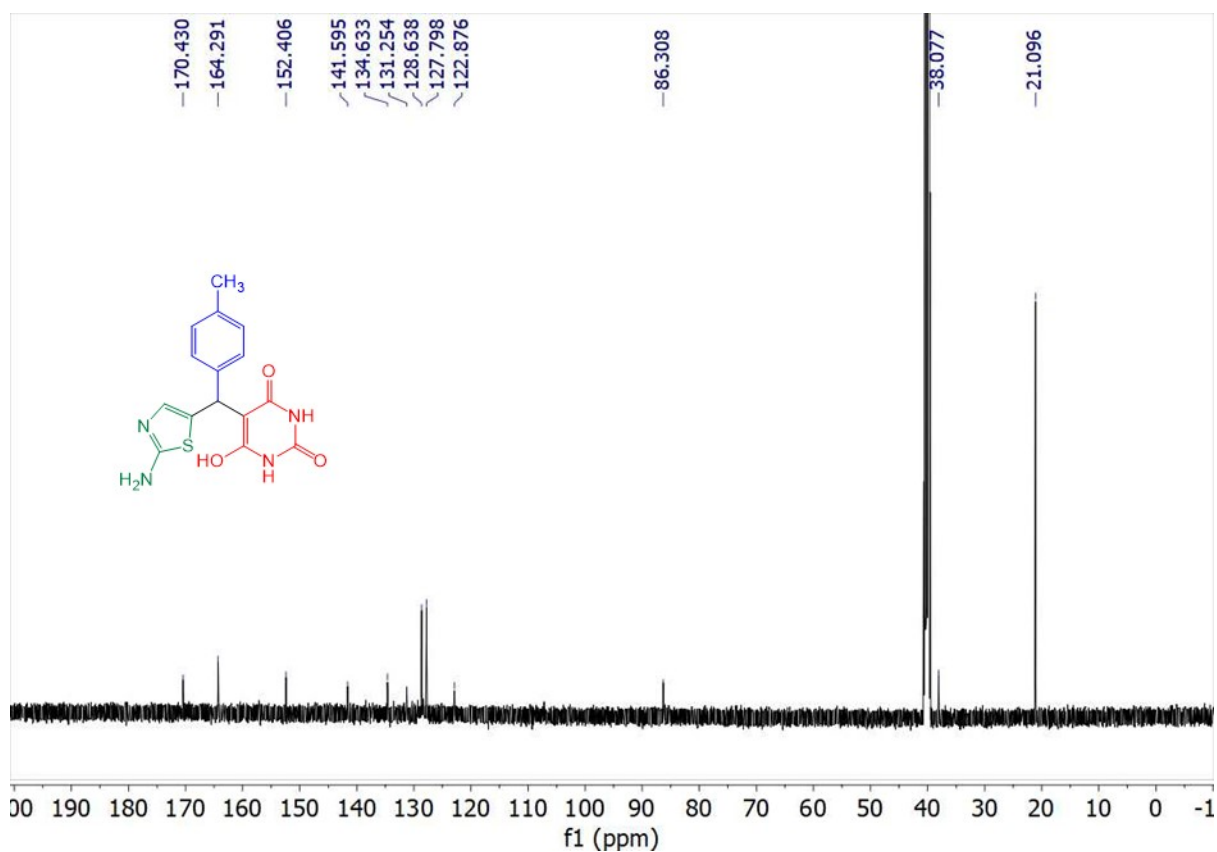



Figure S31:  $^1\text{H-NMR}$  (400 MHz,  $\text{DMSO-d}_6$ ) of Compound **4p**

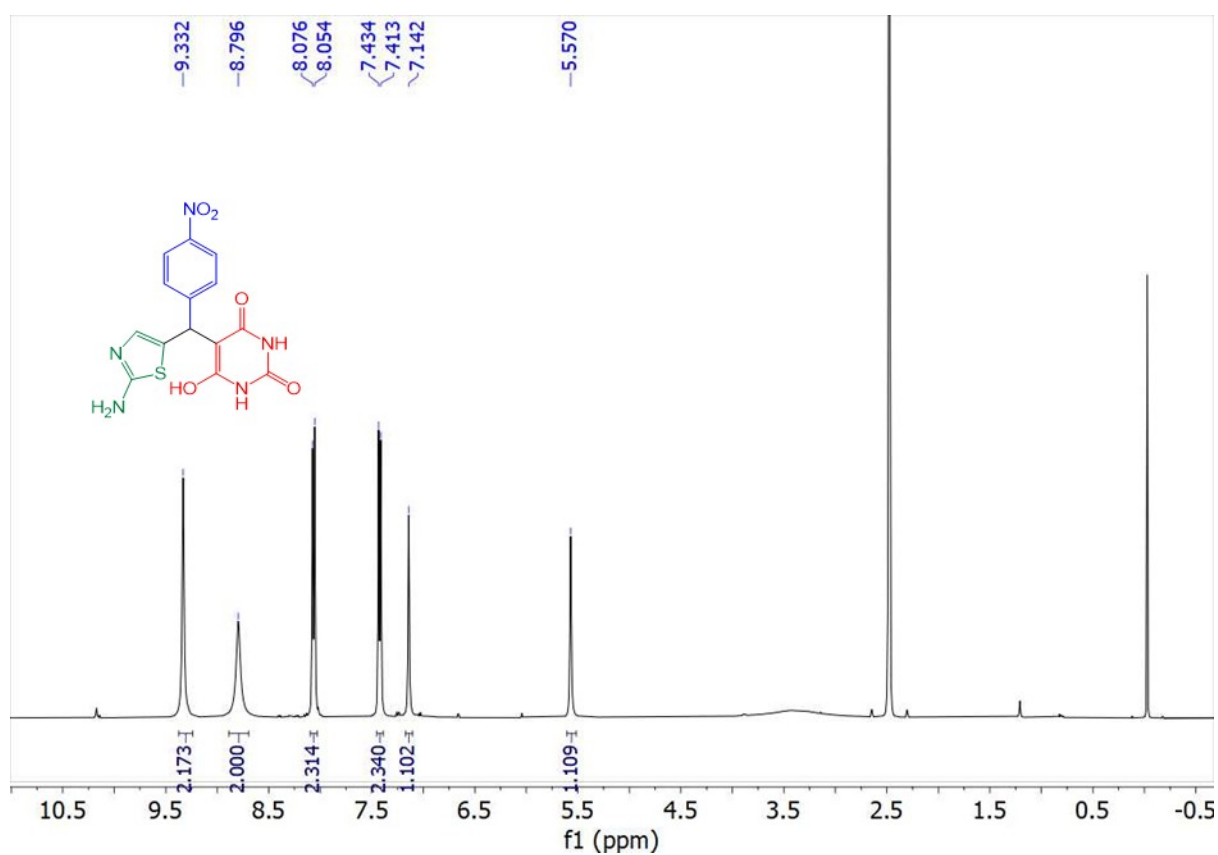

Figure S32:  $^{13}\text{C-NMR}$  (126 MHz,  $\text{DMSO-d}_6$ ) of Compound **4p**

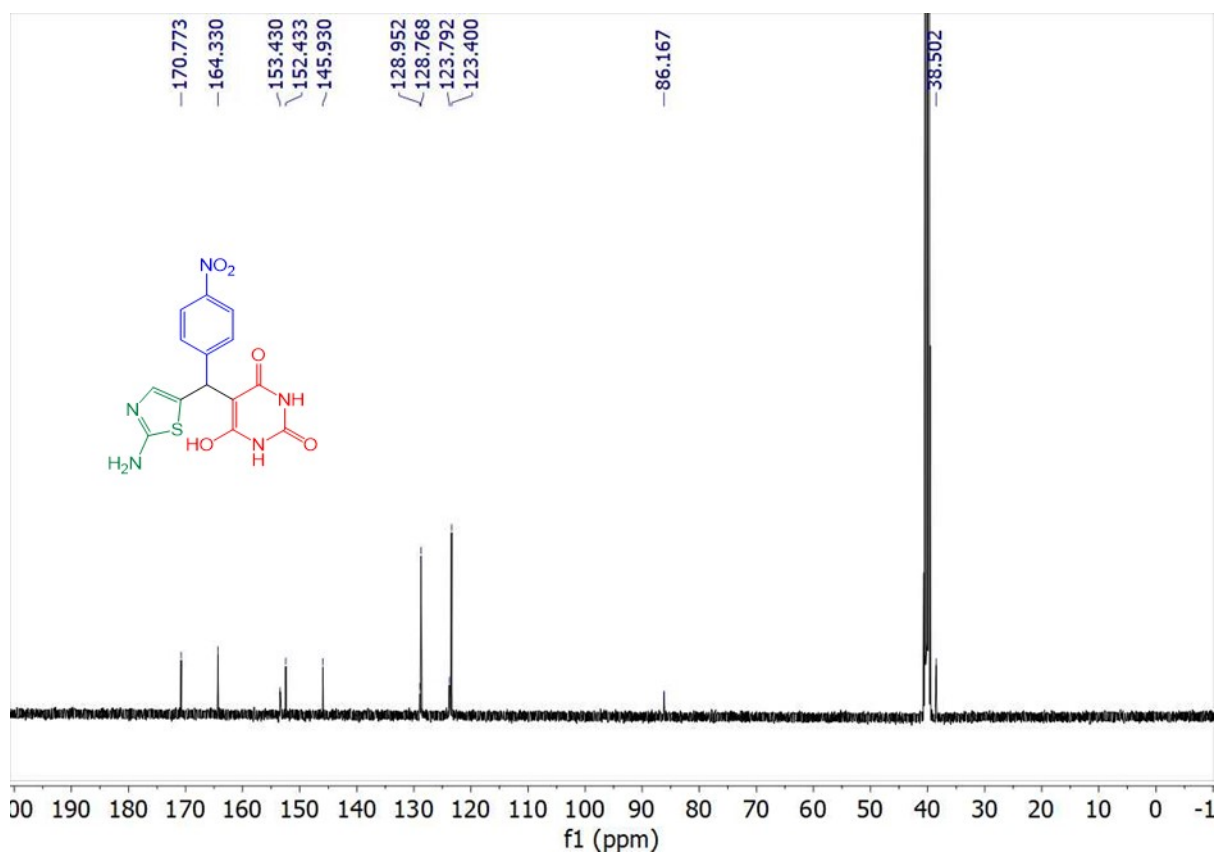

Figure S33:  $^1\text{H-NMR}$  (500 MHz,  $\text{DMSO-d}_6$ ) of Compound **4q**

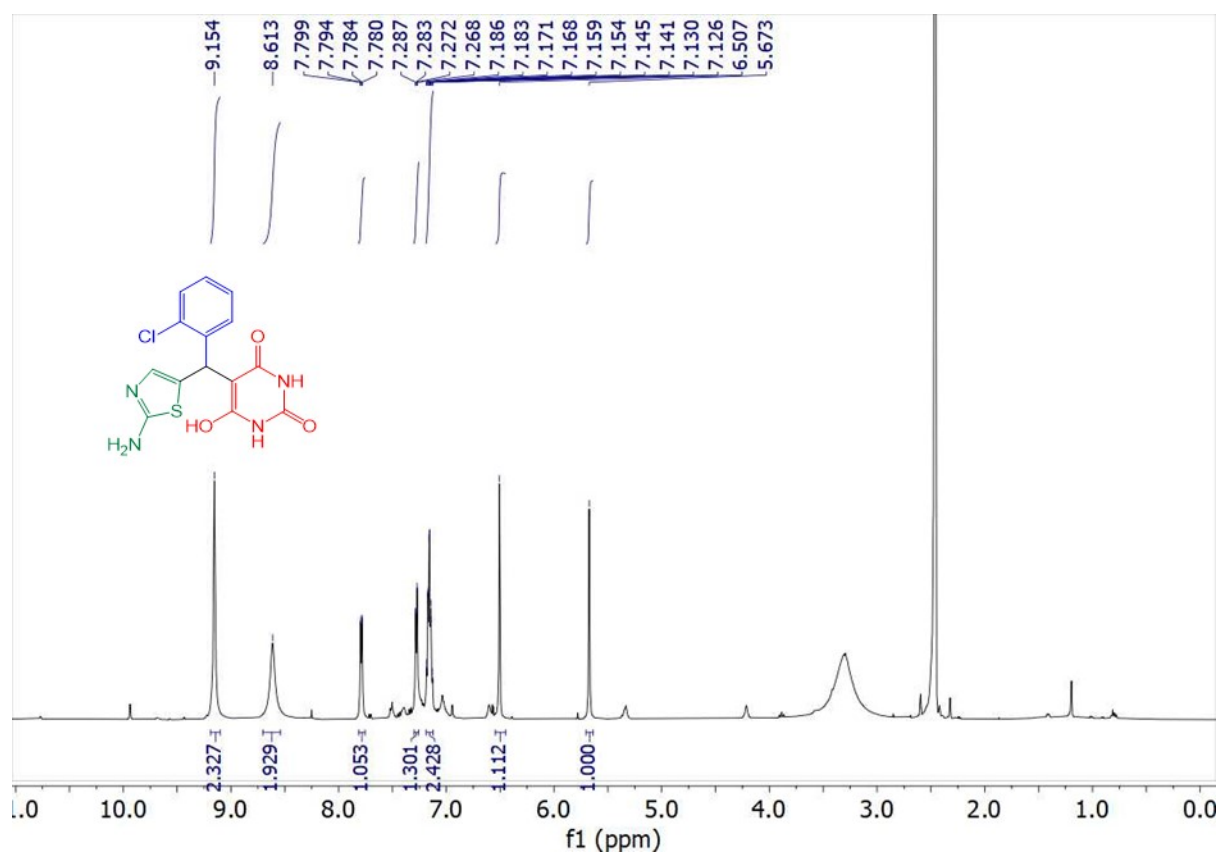

Figure S34:  $^{13}\text{C-NMR}$  (126 MHz,  $\text{DMSO-d}_6$ ) of Compound **4q**

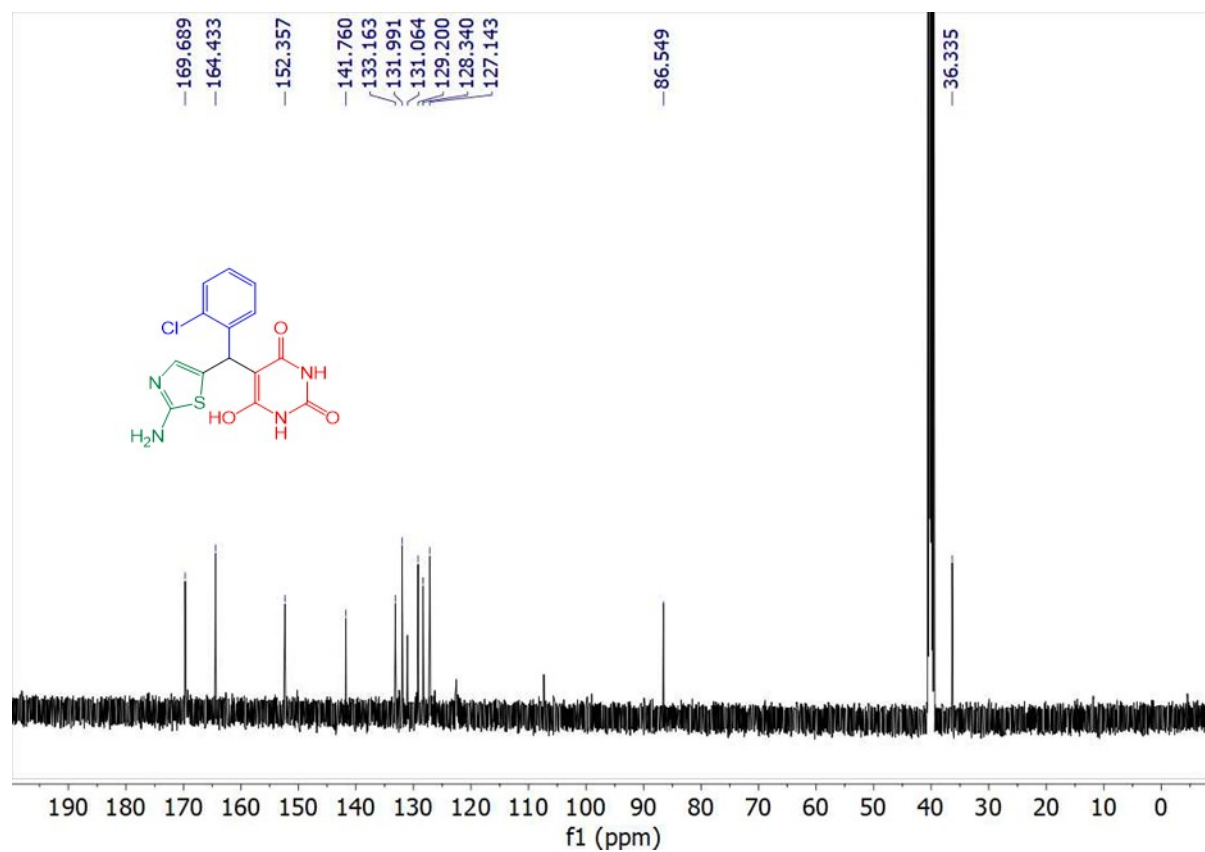

Figure S35:  $^1\text{H-NMR}$  (400 MHz, DMSO- $d_6$ ) of Compound **4r**

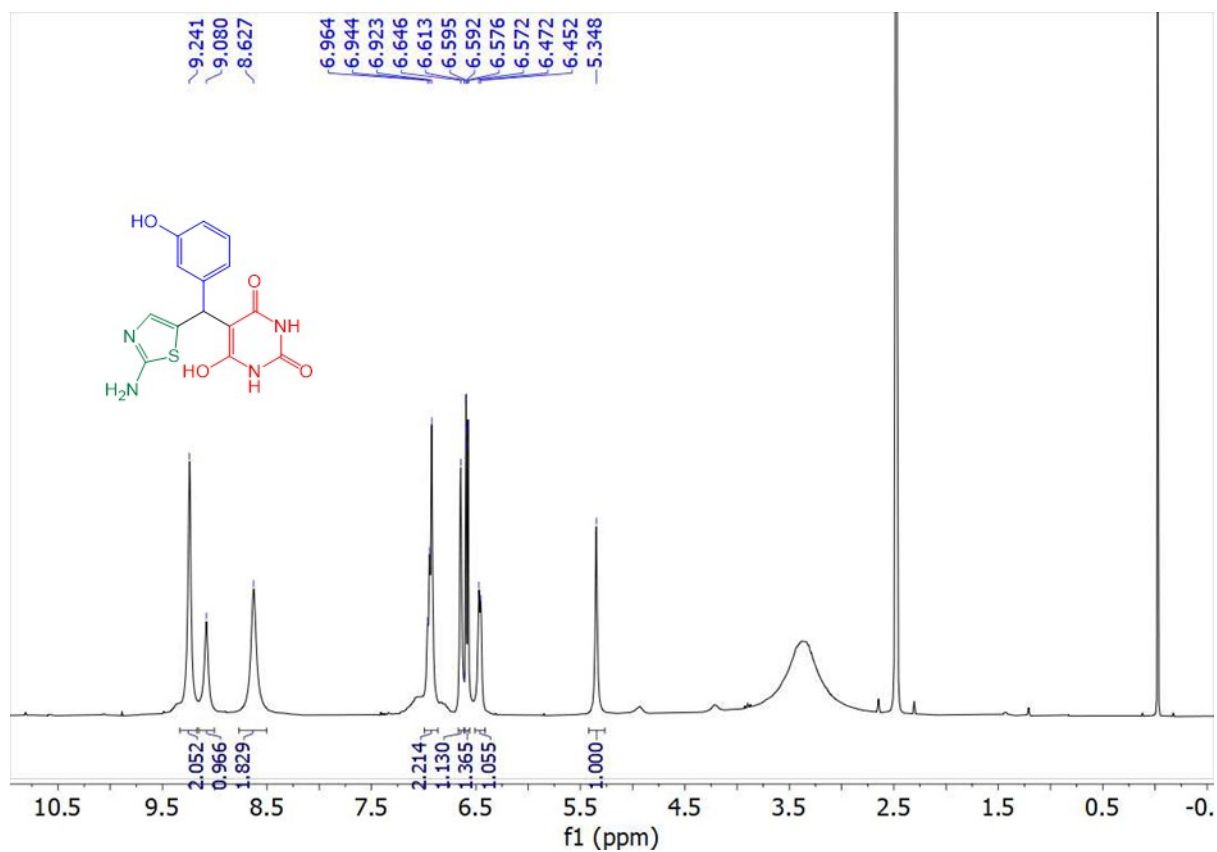

Figure S36:  $^{13}\text{C-NMR}$  (126 MHz, DMSO- $d_6$ ) of Compound **4r**

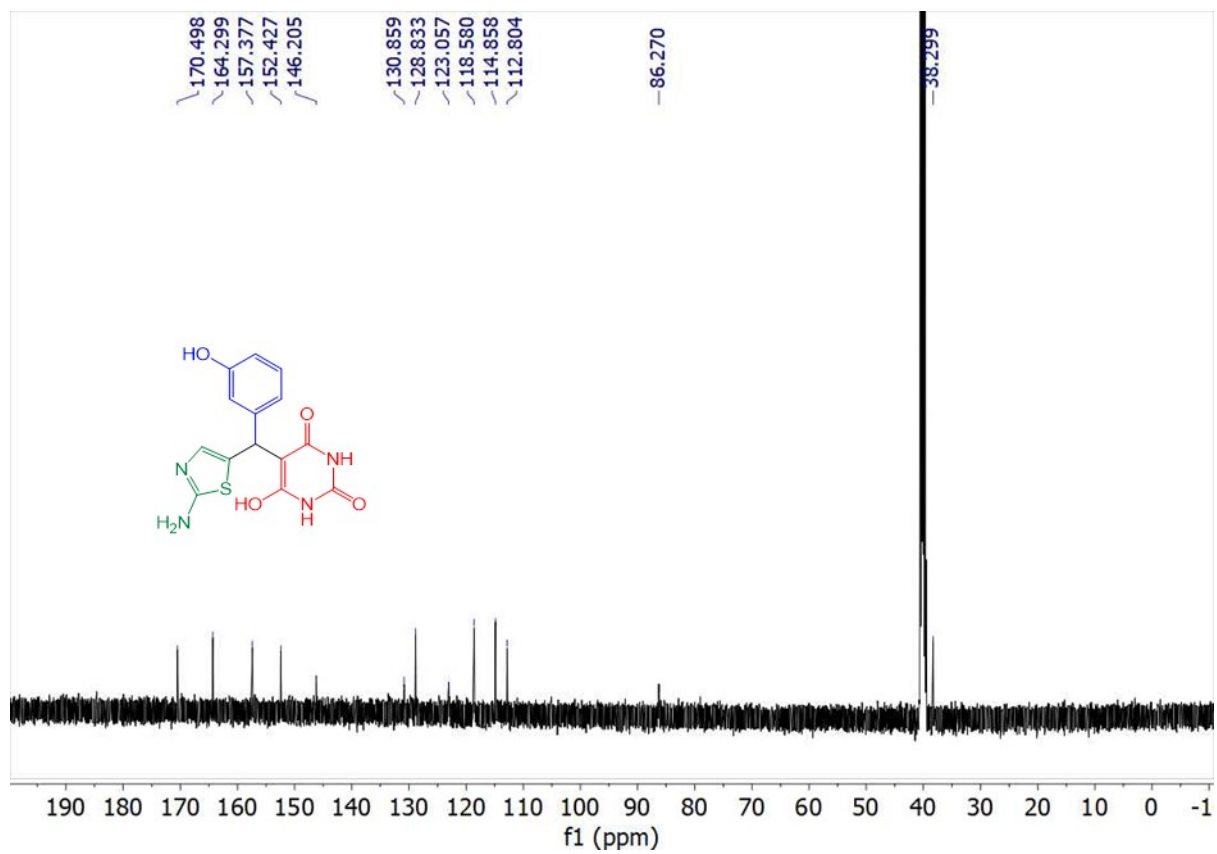

Figure S37: HRMS of Compound **4a**

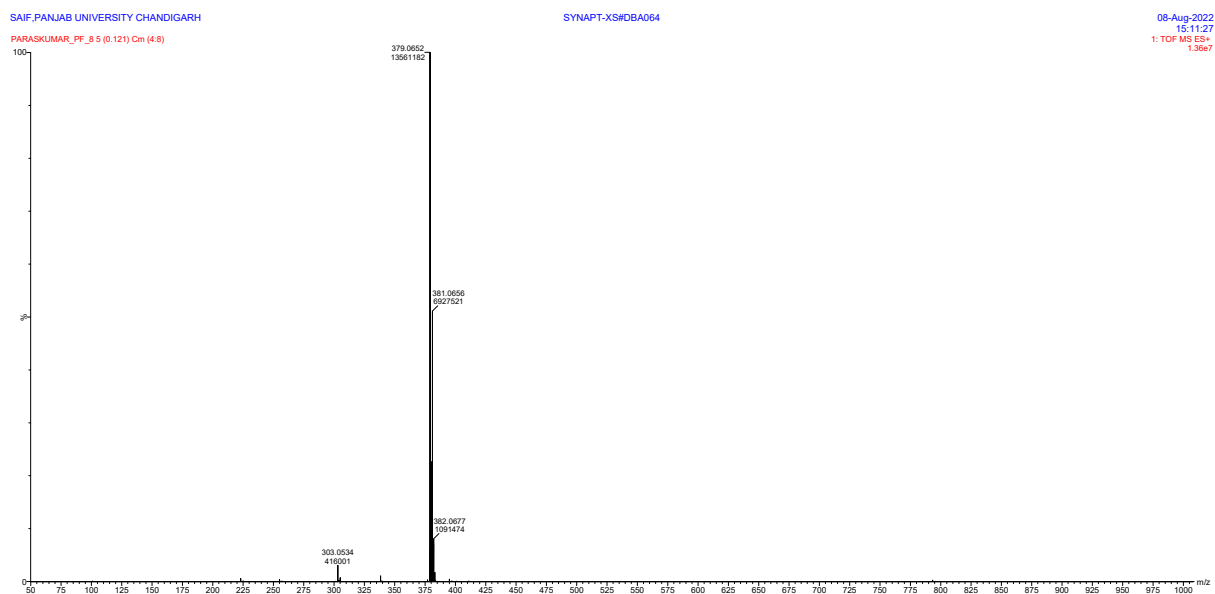

Figure S38: HRMS of Compound **4b**

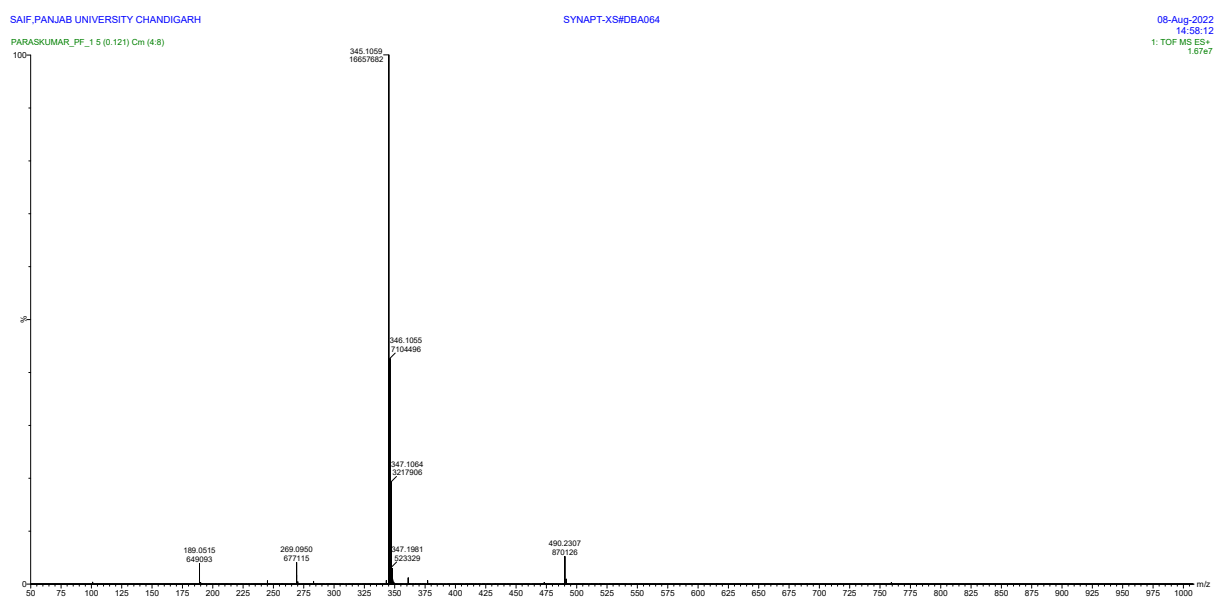

Figure S39: HRMS of Compound **4c**

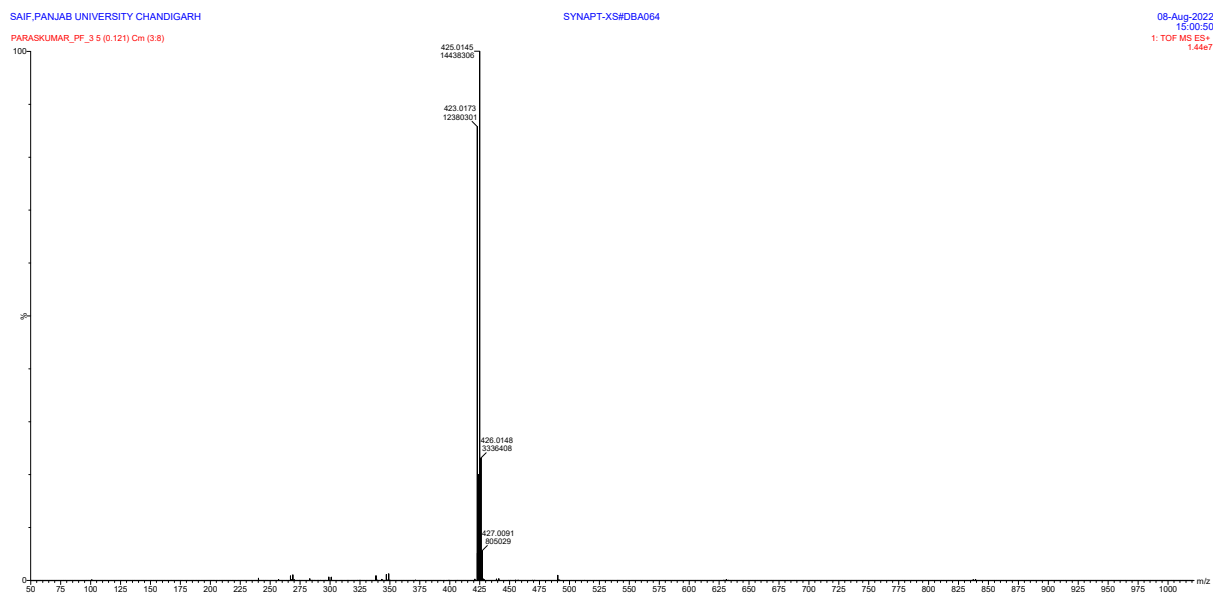

Figure S40: HRMS of Compound **4d**

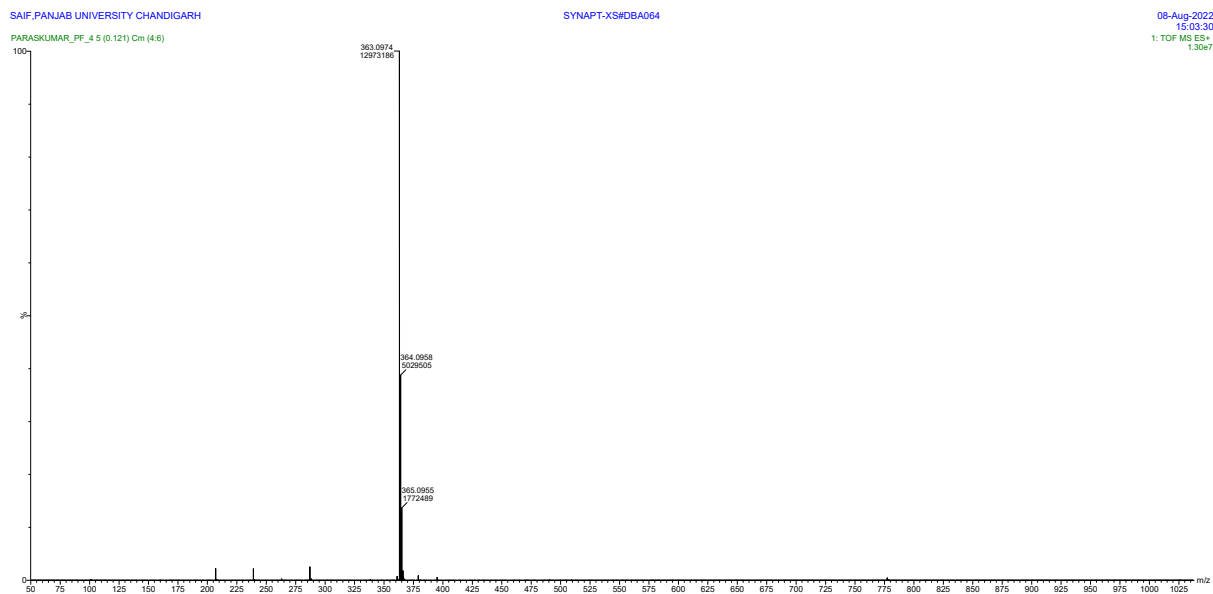

Figure S41: HRMS of Compound **4e**

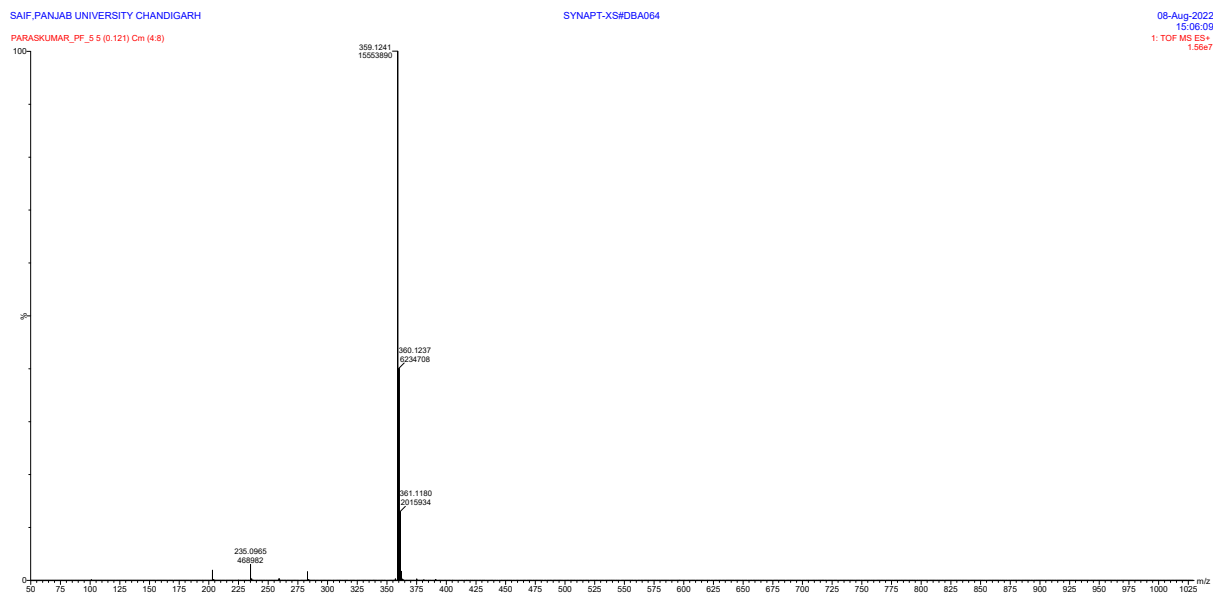

Figure S42: HRMS of Compound **4f**

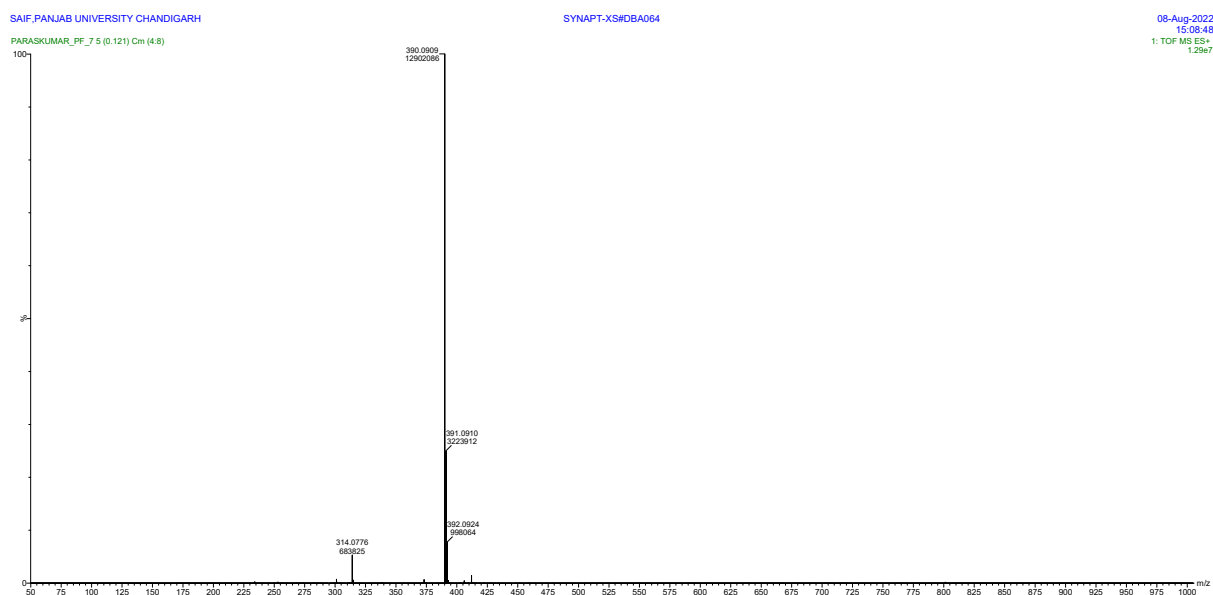

Figure S43: HRMS of Compound **4g**

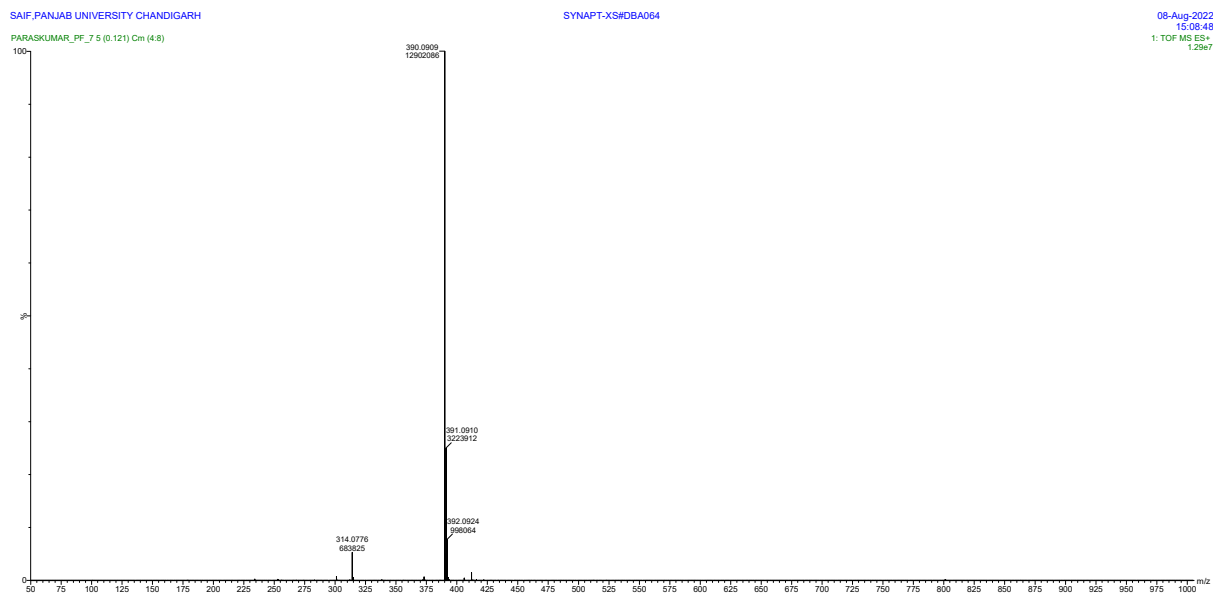

Figure S44: HRMS of Compound **4h**

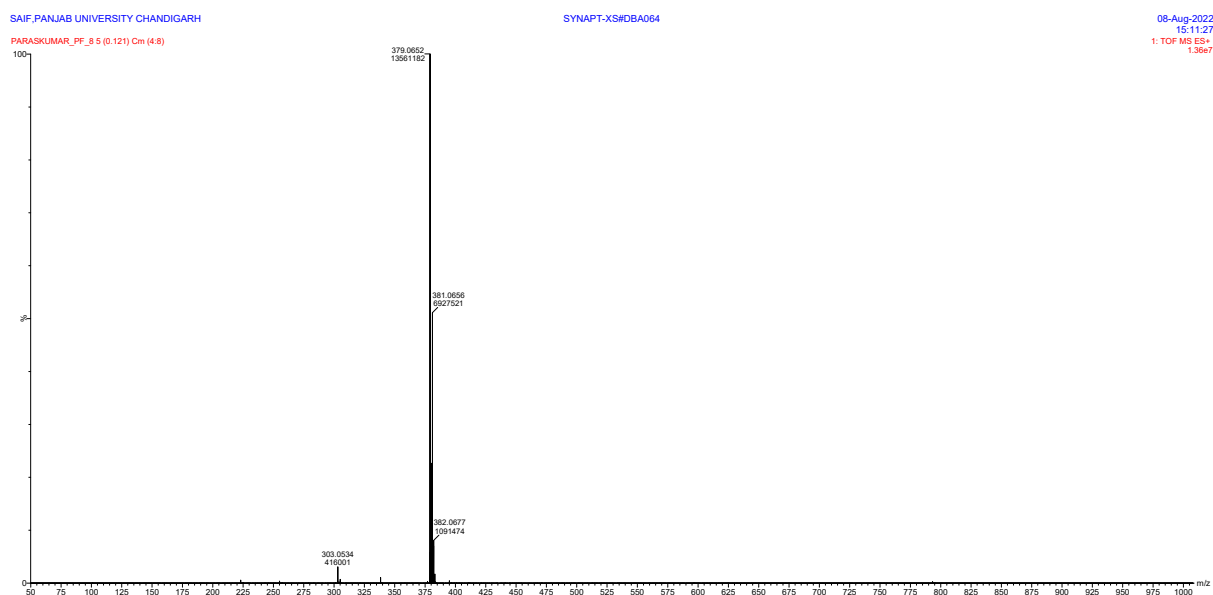

Figure S45: HRMS of Compound **4i**

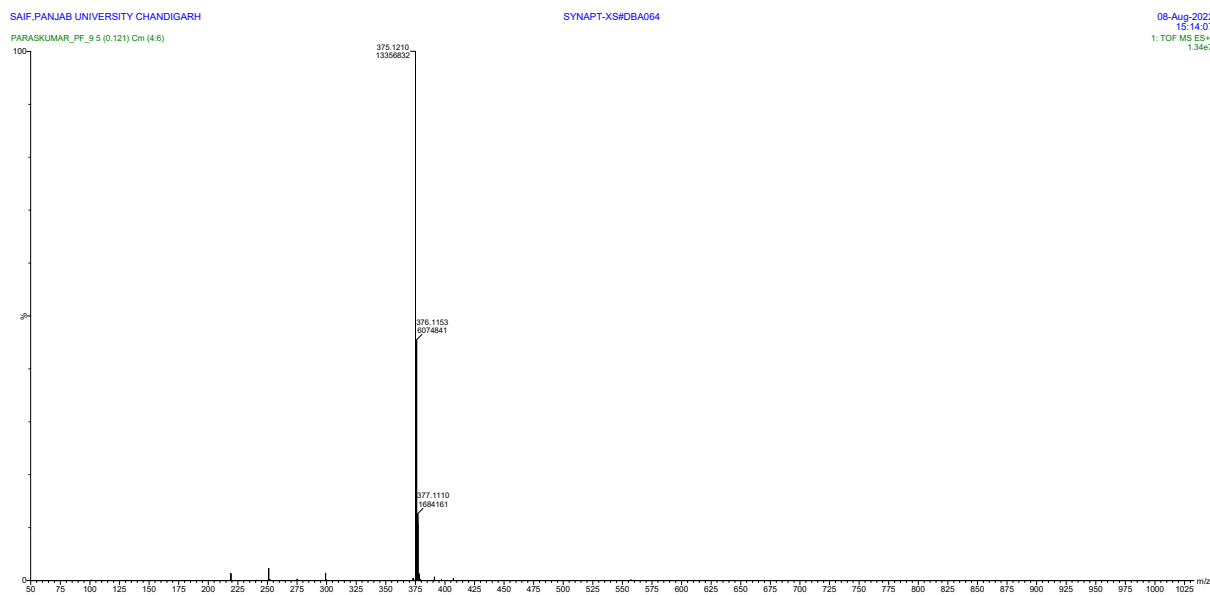

Figure S46: LCMS of Compound **4j**

| Retention Time (MS) | MS Area | Mol. Weight or Ion                           |
|---------------------|---------|----------------------------------------------|
| 0.923               | 213538  | 361.80 I<br>360.90 I<br>205.80 I<br>204.85 I |

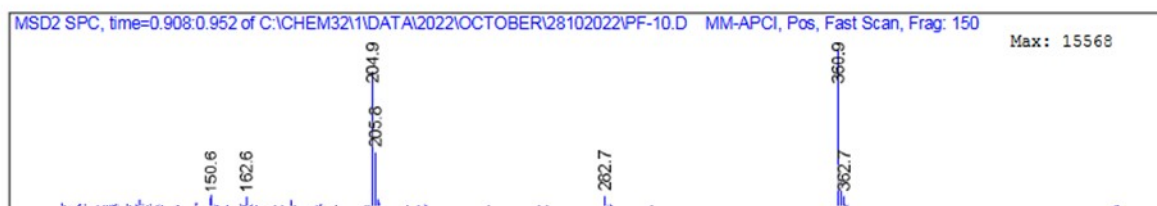

\*\*\* End of Report \*\*\*



Figure S47: HRMS of Compound **4k**

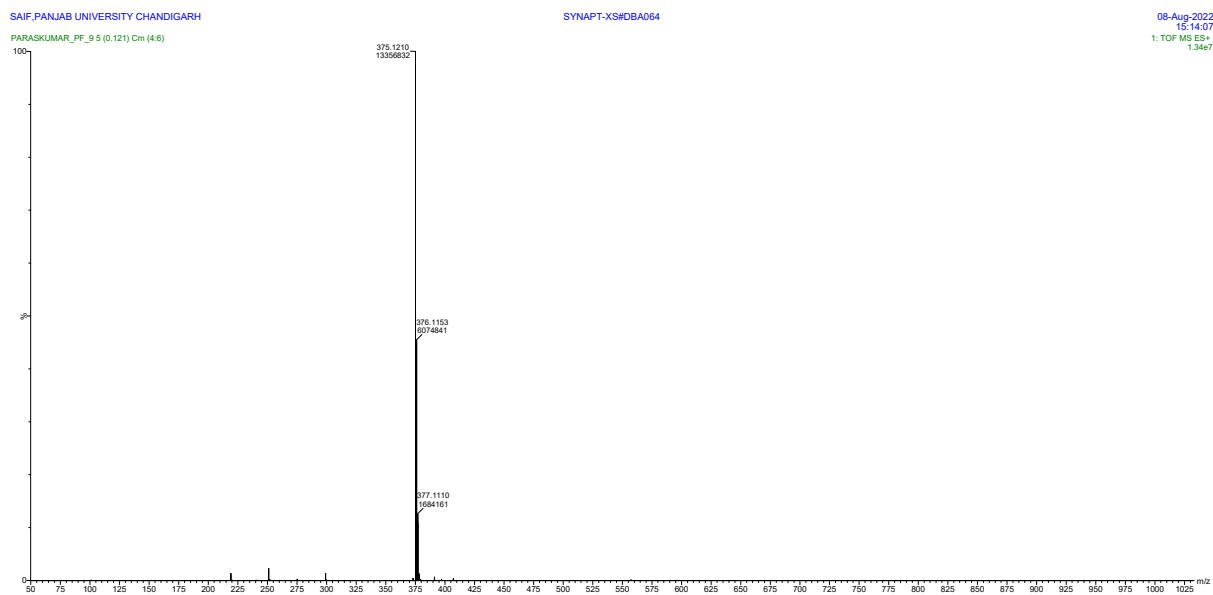

Figure S48: HRMS of Compound **4l**

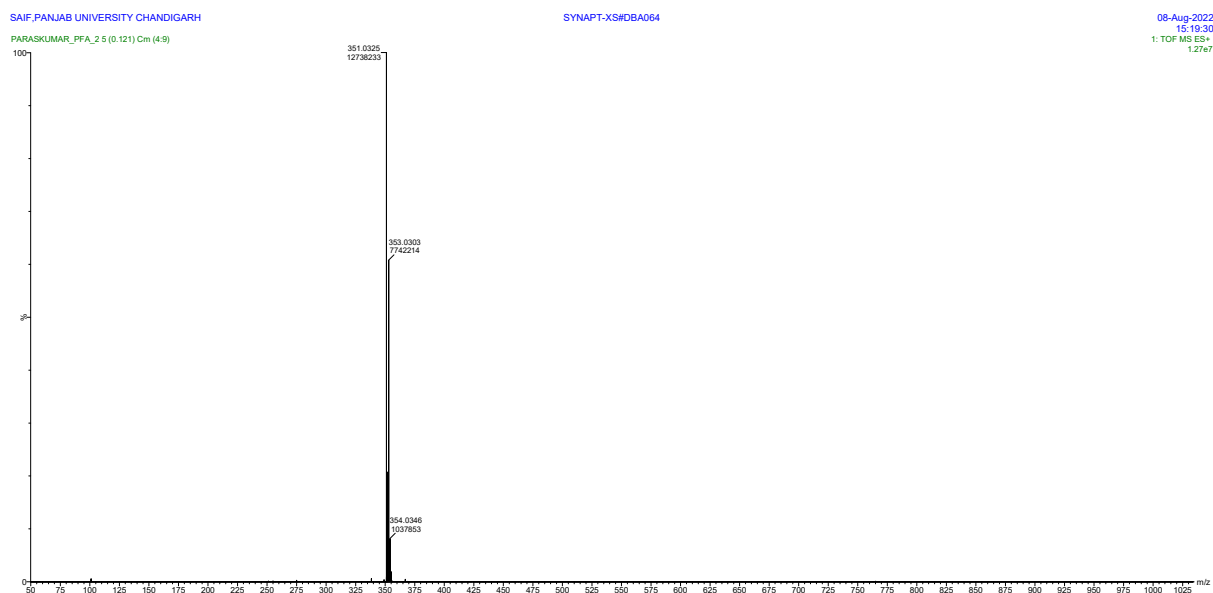

Figure S49: HRMS of Compound **4m**

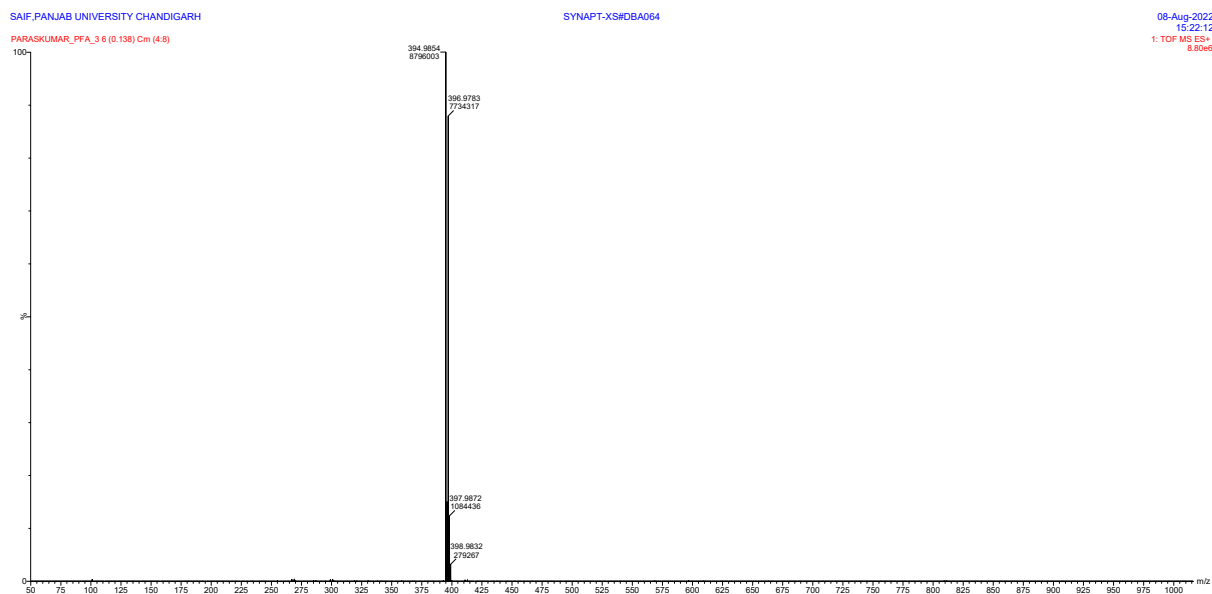

Figure S50: HRMS of Compound **4n**

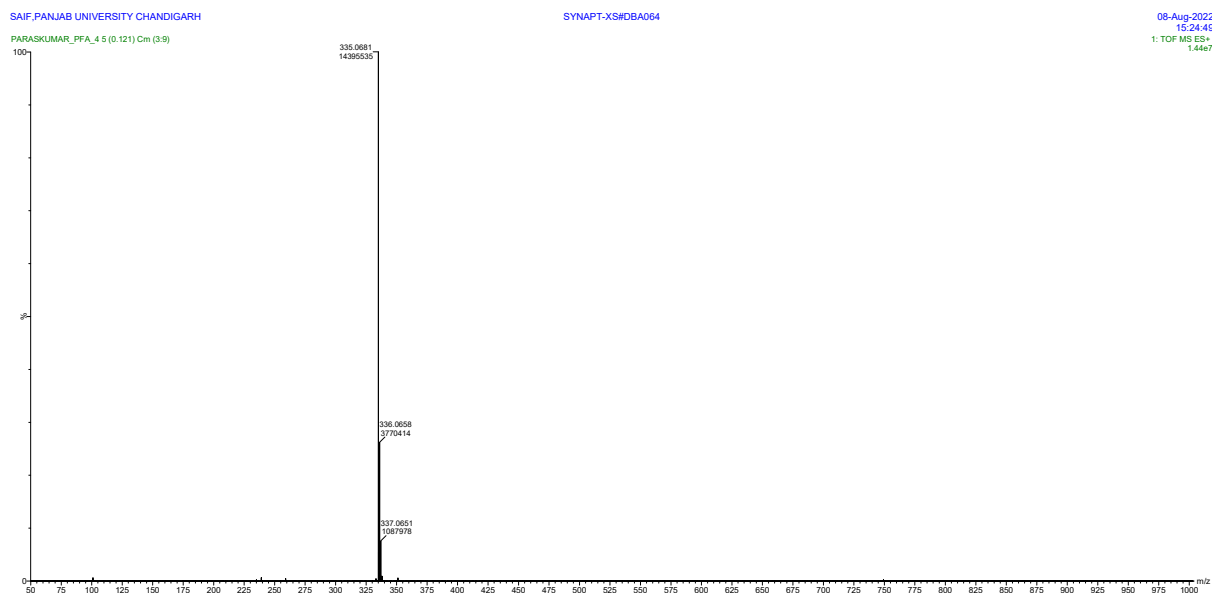

Figure S51: HRMS of Compound **4o**

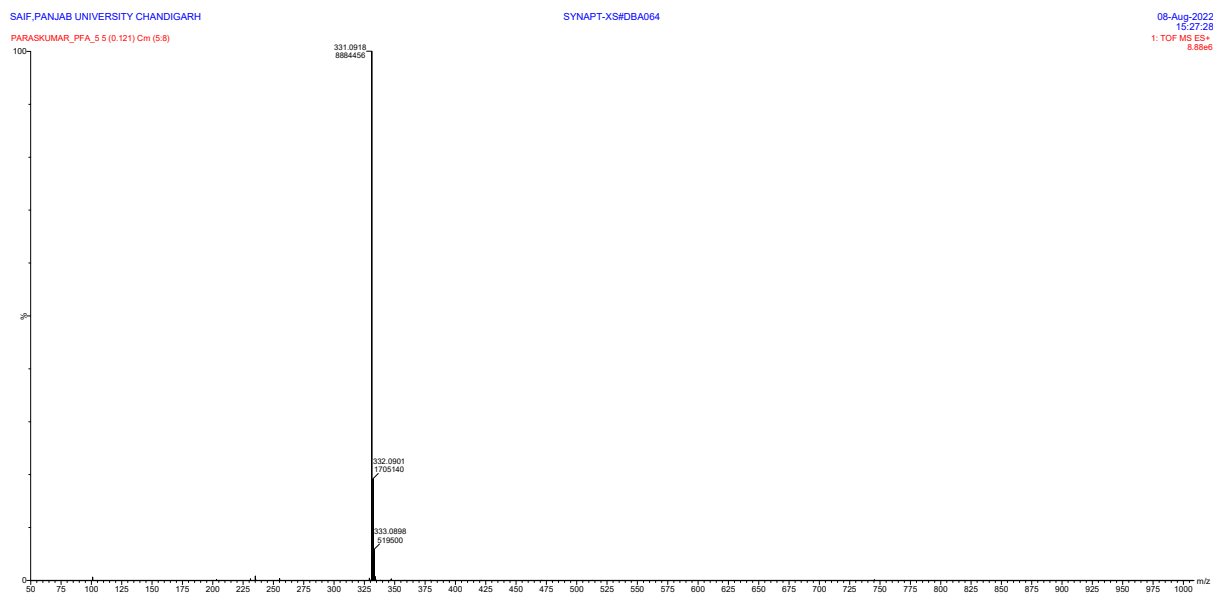

Figure S52: HRMS of Compound **4p**

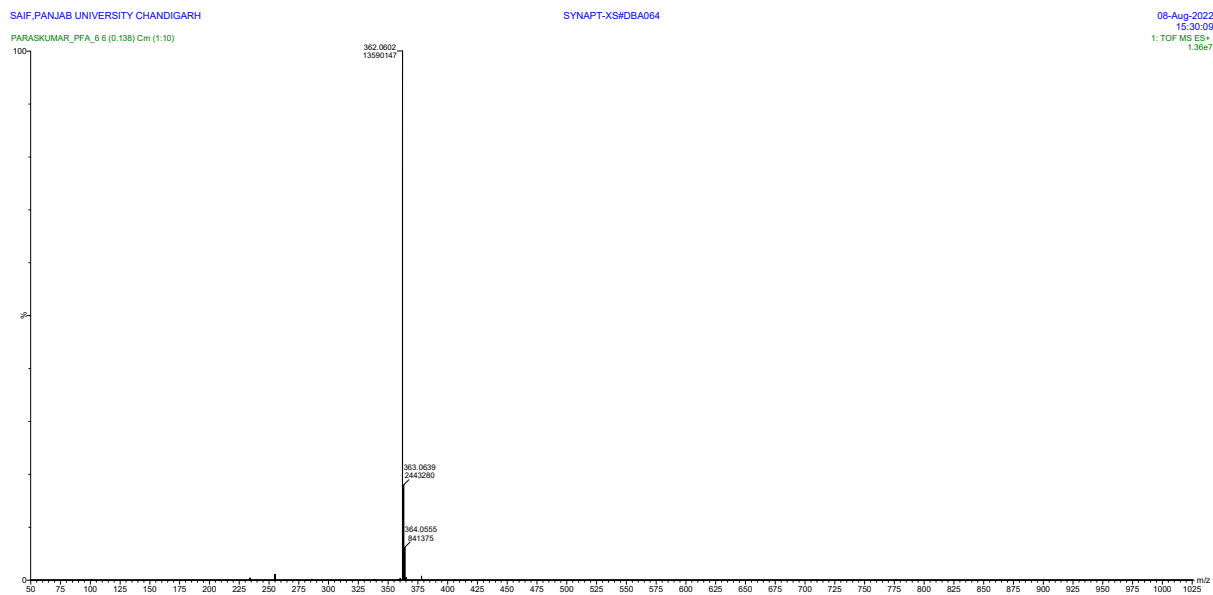

Figure S53: HRMS of Compound **4q**

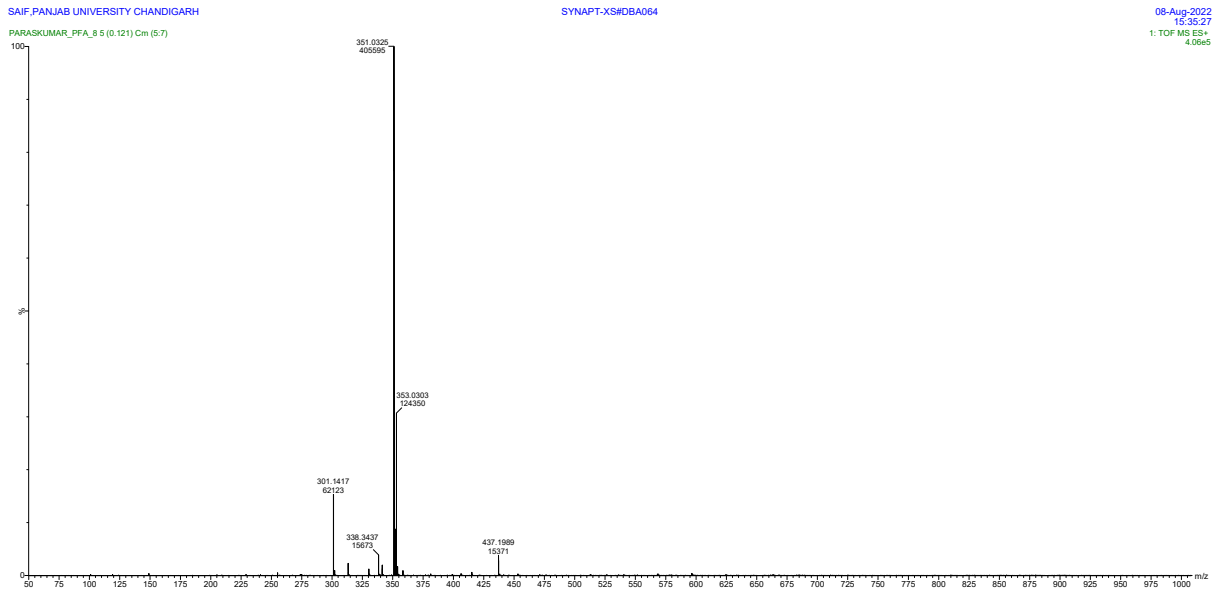

Figure S54: HRMS of Compound **4r**

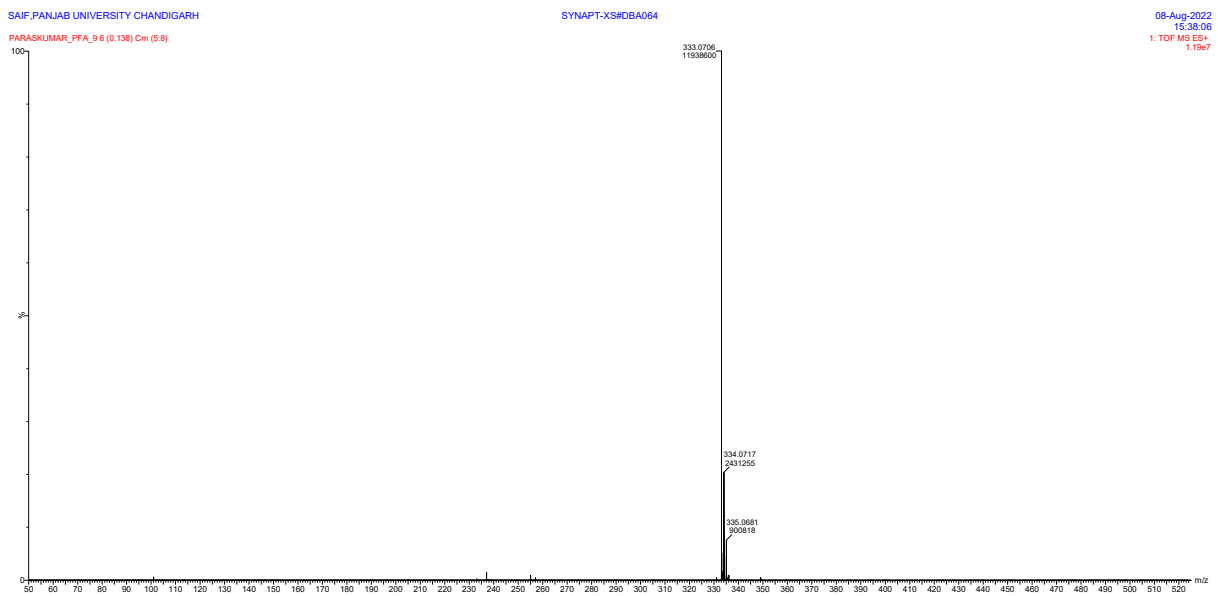

Supplement: d3ra03998f1.pdf [file d3ra03998f1.pdf]
